# Supplementary material for: Exercise and other non-pharmaceutical interventions for cancer-related fatigue in patients during or after cancer treatment: a systematic review incorporating an indirect-comparisons meta-analysis
Source: PubMed Central journal article supplement — Br J Sports Med. 2017 May 13;52(10):651–8. doi: 10.1136/bjsports-2016-096422 (PMC5931245; doi:10.1136/bjsports-2016-096422), 2017-05-13
Supplement: bjsports-2016-096422supp001.pdf [file bjsports-2016-096422supp001.pdf]

Search strategy and history (updated January 4, 2017)

**PubMed**

| Search | Query                                                                                                                                                                                                                   | Items found |
|--------|-------------------------------------------------------------------------------------------------------------------------------------------------------------------------------------------------------------------------|-------------|
| #1     | gait                                                                                                                                                                                                                    | 46670       |
| #2     | walk                                                                                                                                                                                                                    | 97822       |
| #3     | walking                                                                                                                                                                                                                 | 75197       |
| #4     | exercise                                                                                                                                                                                                                | 336412      |
| #5     | exercises                                                                                                                                                                                                               | 352529      |
| #6     | exercising                                                                                                                                                                                                              | 8891        |
| #7     | psychosocial                                                                                                                                                                                                            | 79135       |
| #8     | behavioral                                                                                                                                                                                                              | 1957362     |
| #9     | relaxation                                                                                                                                                                                                              | 124356      |
| #10    | stretching                                                                                                                                                                                                              | 23024       |
| #11    | massage                                                                                                                                                                                                                 | 13085       |
| #12    | music                                                                                                                                                                                                                   | 20462       |
| #13    | yoga                                                                                                                                                                                                                    | 3792        |
| #14    | tai-chi                                                                                                                                                                                                                 | 1742        |
| #15    | "tai chi"                                                                                                                                                                                                               | 1102        |
| #16    | qigong                                                                                                                                                                                                                  | 506         |
| #17    | "qi gong"                                                                                                                                                                                                               | 83          |
| #18    | qi-gong                                                                                                                                                                                                                 | 1162        |
| #19    | dance                                                                                                                                                                                                                   | 6056        |
| #20    | dancing                                                                                                                                                                                                                 | 3160        |
| #21    | physical activity                                                                                                                                                                                                       | 436503      |
| #22    | physical activities                                                                                                                                                                                                     | 373599      |
| #23    | training                                                                                                                                                                                                                | 1300659     |
| #24    | conditioning                                                                                                                                                                                                            | 104370      |
| #25    | (resistance (training or exercise or exercises))                                                                                                                                                                        | 38820       |
| #26    | (strength (training or exercise or exercises))                                                                                                                                                                          | 38343       |
| #27    | strengthening                                                                                                                                                                                                           | 21108       |
| #28    | (inspiratory OR expiratory) muscle training                                                                                                                                                                             | 1242        |
| #29    | (endurance (training or exercise or exercises))                                                                                                                                                                         | 24798       |
| #30    | energy conservation                                                                                                                                                                                                     | 10110       |
| #31    | #1 OR #2 OR #3 ... OR #30                                                                                                                                                                                               | 3613466     |
| #32    | ((((randomized controlled trial[pt] OR controlled clinical trial[pt] OR randomized[tiab] OR placebo[tiab] OR clinical trials as topic[mesh:noexp] OR randomly[tiab] OR trial[ti] NOT (animals[mh] NOT humans [mh])))))) | 989841      |
| 33     | #32 AND #31                                                                                                                                                                                                             | 225651      |
| #34    | fatigue                                                                                                                                                                                                                 | 85107       |
| #35    | #34 AND #33                                                                                                                                                                                                             | 5494        |
| #36    | cancer                                                                                                                                                                                                                  | 3430222     |
| #37    | neoplasia                                                                                                                                                                                                               | 2892300     |
| #38    | oncology                                                                                                                                                                                                                | 3030274     |
| #39    | tumor                                                                                                                                                                                                                   | 3359871     |
| #40    | malignant                                                                                                                                                                                                               | 327740      |
| #41    | #36 OR #37 OR #38 OR #39 OR #40                                                                                                                                                                                         | 3878796     |
| #42    | #41 AND #35                                                                                                                                                                                                             | 1009        |

**Central**

| <b>Search</b> | <b>Query</b>                                                                                       | <b>Items found</b> |
|---------------|----------------------------------------------------------------------------------------------------|--------------------|
| #1            | gait                                                                                               | 4173               |
| #2            | walk                                                                                               | 6106               |
| #3            | walking                                                                                            | 11301              |
| #4            | exercise                                                                                           | 54826              |
| #5            | exercises                                                                                          | 11434              |
| #6            | exercising                                                                                         | 1409               |
| #7            | psychosocial                                                                                       | 8740               |
| #8            | behavioral                                                                                         | 22543              |
| #9            | behavioural                                                                                        | 9786               |
| #10           | relaxation                                                                                         | 7886               |
| #11           | stretching                                                                                         | 2409               |
| #12           | massage                                                                                            | 2954               |
| #13           | music                                                                                              | 2527               |
| #14           | yoga                                                                                               | 1594               |
| #15           | tai chi                                                                                            | 730                |
| #16           | tai-chi                                                                                            | 730                |
| #17           | qigong                                                                                             | 316                |
| #18           | qi gong                                                                                            | 55                 |
| #19           | dance                                                                                              | 524                |
| #20           | dancing                                                                                            | 302                |
| #21           | physical activity                                                                                  | 20960              |
| #22           | physical activities                                                                                | 7580               |
| #23           | training                                                                                           | 45268              |
| #24           | conditioning                                                                                       | 5249               |
| #25           | (resistance (training or exercise or exercises))<br>(strength (training or exercise or exercises)) | 8478               |
| #26           | exercising                                                                                         | 10839              |
| #27           | strengthening                                                                                      | 2269               |
| #28           | (endurance (training or exercise or exercises))<br>(inspiratory or expiratory) and muscle          | 5667               |
| #29           | training                                                                                           | 818                |
| #30           | energy conservation                                                                                | 356                |
| #31           | #1 or #2 or #3 ... or #30                                                                          | 144401             |
| #32           | fatigue                                                                                            | 17994              |
| #33           | #31 and #32                                                                                        | 6395               |
| #34           | cancer                                                                                             | 103961             |
| #35           | neoplasia                                                                                          | 1902               |
| #36           | oncology                                                                                           | 44779              |
| #37           | tumor                                                                                              | 28408              |
| #38           | tumour                                                                                             | 7202               |
| #39           | malignant                                                                                          | 7836               |
| #40           | #34 or #35 or #36 or #37 or #38 or #39                                                             | 127213             |
| #41           | #33 and #40                                                                                        | 1552               |
