# Supplementary material for: Exercise and other non-pharmaceutical interventions for cancer-related fatigue in patients during or after cancer treatment: a systematic review incorporating an indirect-comparisons meta-analysis
Source: PubMed Central journal article supplement — Br J Sports Med. 2017 May 13;52(10):651–8. doi: 10.1136/bjsports-2016-096422 (PMC5931245; doi:10.1136/bjsports-2016-096422), 2017-05-13
Supplement: bjsports-2016-096422supp002.pdf [file bjsports-2016-096422supp002.pdf]

Appendix 2 Figure risk of bias per comparison

During cancer treatment

| Comparison                         | N Comparisons | Random sequence generation | Allocation concealment | Baseline Differences | Blinding patients | Blinding therapists | Blinding outcome assessor | Dropouts less than 15% | Intention to treat (ITT) |
|------------------------------------|---------------|----------------------------|------------------------|----------------------|-------------------|---------------------|---------------------------|------------------------|--------------------------|
| Aerobic - Control                  | 33            | 91%                        | 39%                    | 88%                  | 0%                | 0%                  | 12%                       | 79%                    | 58%                      |
| CBT/Psychosocial - Control         | 17            | 100%                       | 41%                    | 71%                  | 0%                | 0%                  | 24%                       | 53%                    | 41%                      |
| Combined - Control                 | 21            | 100%                       | 38%                    | 90%                  | 0%                | 0%                  | 10%                       | 71%                    | 52%                      |
| Combined - Aerobic                 | 1             | 100%                       | 0%                     | 100%                 | 0%                | 0%                  | 0%                        | 100%                   | 100%                     |
| CombinedCBT - Control              | 6             | 100%                       | 17%                    | 67%                  | 0%                | 0%                  | 0%                        | 50%                    | 17%                      |
| CombinedCBT - Aerobic              | 1             | 100%                       | 100%                   | 100%                 | 0%                | 0%                  | 0%                        | 100%                   | 0%                       |
| Dance - Control                    | 2             | 50%                        | 0%                     | 50%                  | 0%                | 0%                  | 0%                        | 100%                   | 50%                      |
| HealingTouch/Polarity - Control    | 3             | 100%                       | 0%                     | 33%                  | 0%                | 0%                  | 33%                       | 67%                    | 0%                       |
| Massage - Control                  | 4             | 100%                       | 0%                     | 50%                  | 0%                | 0%                  | 0%                        | 75%                    | 0%                       |
| Massage - HealingTouch/Polarity    | 2             | 100%                       | 0%                     | 50%                  | 0%                | 0%                  | 0%                        | 50%                    | 0%                       |
| Music - Control                    | 1             | 100%                       | 100%                   | 0%                   | 0%                | 0%                  | 0%                        | 100%                   | 100%                     |
| Relaxation - Control               | 8             | 100%                       | 13%                    | 75%                  | 0%                | 0%                  | 13%                       | 50%                    | 25%                      |
| Relaxation - CBT/PsychoSocial      | 1             | 100%                       | 0%                     | 0%                   | 0%                | 0%                  | 0%                        | 0%                     | 0%                       |
| Relaxation - Combined              | 1             | 100%                       | 100%                   | 100%                 | 0%                | 0%                  | 0%                        | 0%                     | 0%                       |
| Relaxation - HealingTouch/Polarity | 1             | 100%                       | 0%                     | 0%                   | 0%                | 0%                  | 100%                      | 100%                   | 0%                       |
| Resistance - Control               | 7             | 100%                       | 71%                    | 100%                 | 0%                | 0%                  | 0%                        | 57%                    | 43%                      |
| Resistance - Aerobic               | 3             | 100%                       | 100%                   | 100%                 | 0%                | 0%                  | 0%                        | 67%                    | 100%                     |
| Resistance - Relaxation            | 2             | 100%                       | 100%                   | 100%                 | 0%                | 0%                  | 0%                        | 100%                   | 100%                     |
| TaiChi -Control                    | 4             | 100%                       | 0%                     | 75%                  | 0%                | 0%                  | 0%                        | 50%                    | 0%                       |
| TaiChi - Resistance                | 1             | 100%                       | 0%                     | 100%                 | 0%                | 0%                  | 0%                        | 0%                     | 0%                       |
| Yoga - Control                     | 9             | 89%                        | 56%                    | 78%                  | 0%                | 0%                  | 0%                        | 44%                    | 44%                      |
| Yoga - Combined                    | 1             | 100%                       | 0%                     | 0%                   | 0%                | 0%                  | 0%                        | 100%                   | 100%                     |
| Yoga - Relaxation                  | 1             | 100%                       | 0%                     | 100%                 | 0%                | 0%                  | 0%                        | 0%                     | 0%                       |
| <b>Total</b>                       | <b>130</b>    | <b>98%</b>                 | <b>39%</b>             | <b>86%</b>           | <b>1%</b>         | <b>0%</b>           | <b>22%</b>                | <b>65%</b>             | <b>56%</b>               |

Percentages are percentages of correct (low risk of bias) studies. Green indicates low risk of bias, red indicates high risk of bias.

After cancer treatment

| Comparison                            | N Comparisons | Random sequence generation | Allocation concealment | Baseline Differences | Blinding patients | Blinding therapists | Blinding outcome assessor | Dropouts less than 15% | Intention to treat (ITT) |
|---------------------------------------|---------------|----------------------------|------------------------|----------------------|-------------------|---------------------|---------------------------|------------------------|--------------------------|
| Aerobic - Control                     | 25            | 96%                        | 40%                    | 96%                  | 0%                | 0%                  | 36%                       | 84%                    | 56%                      |
| CBT/Psychosocial - Control            | 29            | 100%                       | 34%                    | 69%                  | 0%                | 0%                  | 7%                        | 69%                    | 45%                      |
| Combined - Control                    | 29            | 97%                        | 41%                    | 90%                  | 0%                | 0%                  | 31%                       | 76%                    | 69%                      |
| Combined - Aerobic                    | 2             | 100%                       | 0%                     | 100%                 | 0%                | 0%                  | 50%                       | 100%                   | 50%                      |
| CombinedCBT - Control                 | 11            | 100%                       | 55%                    | 91%                  | 0%                | 0%                  | 18%                       | 45%                    | 73%                      |
| CombinedCBT - Aerobic                 | 1             | 100%                       | 100%                   | 100%                 | 0%                | 0%                  | 0%                        | 100%                   | 100%                     |
| CombinedCBT - Combined                | 3             | 100%                       | 33%                    | 100%                 | 0%                | 0%                  | 0%                        | 100%                   | 100%                     |
| Dance - Control                       | 2             | 100%                       | 0%                     | 50%                  | 0%                | 0%                  | 0%                        | 50%                    | 0%                       |
| Inspiratory Muscle Training - Control | 2             | 100%                       | 0%                     | 50%                  | 50%               | 0%                  | 50%                       | 0%                     | 0%                       |
| Massage - Control                     | 1             | 100%                       | 100%                   | 100%                 | 0%                | 0%                  | 0%                        | 100%                   | 0%                       |
| Relaxation - Aerobic                  | 1             | 100%                       | 100%                   | 100%                 | 0%                | 0%                  | 0%                        | 100%                   | 0%                       |
| Resistance - Control                  | 10            | 100%                       | 50%                    | 100%                 | 0%                | 0%                  | 30%                       | 50%                    | 60%                      |
| Resistance - Aerobic                  | 3             | 100%                       | 0%                     | 100%                 | 0%                | 0%                  | 0%                        | 0%                     | 33%                      |
| Resistance - Relaxation               | 1             | 100%                       | 0%                     | 100%                 | 0%                | 0%                  | 100%                      | 100%                   | 100%                     |
| TaiChi -Control                       | 5             | 100%                       | 40%                    | 80%                  | 20%               | 0%                  | 20%                       | 40%                    | 40%                      |
| TaiChi -Dance                         | 1             | 100%                       | 0%                     | 100%                 | 0%                | 0%                  | 0%                        | 100%                   | 0%                       |
| TaiChi - Relaxation                   | 1             | 100%                       | 100%                   | 100%                 | 0%                | 0%                  | 0%                        | 0%                     | 0%                       |
| Yoga - Control                        | 14            | 93%                        | 50%                    | 79%                  | 0%                | 0%                  | 21%                       | 50%                    | 64%                      |
| Yoga - Combined                       | 1             | 100%                       | 0%                     | 100%                 | 0%                | 0%                  | 0%                        | 0%                     | 0%                       |
| Yoga - Resistance                     | 1             | 100%                       | 0%                     | 100%                 | 0%                | 0%                  | 0%                        | 0%                     | 0%                       |
| <b>Total</b>                          | <b>143</b>    | <b>98%</b>                 | <b>40%</b>             | <b>86%</b>           | <b>1%</b>         | <b>0%</b>           | <b>22%</b>                | <b>65%</b>             | <b>55%</b>               |

Percentages are percentages of correct (low risk of bias) studies. Green indicates low risk of bias, red indicates high risk of bias.
