# Supplementary material for: Exercise and other non-pharmaceutical interventions for cancer-related fatigue in patients during or after cancer treatment: a systematic review incorporating an indirect-comparisons meta-analysis
Source: PubMed Central journal article supplement — Br J Sports Med. 2017 May 13;52(10):651–8. doi: 10.1136/bjsports-2016-096422 (PMC5931245; doi:10.1136/bjsports-2016-096422), 2017-05-13
Supplement: bjsports-2016-096422supp003.pdf [file bjsports-2016-096422supp003.pdf]

Appendix 3 Table 1 Characteristics of the included studies

| Nr   | study                   | Country        | Cancer-type | Main-cancer<br>(in mixed<br>studies) | Time period | Treatment arm 1                                        | Treatment arm 2 | Sample size arm<br>1 | Treatment arm 2                | Sample size<br>arm 2 | Treatment<br>arm 3 | Sample<br>Size arm<br>3 |
|------|-------------------------|----------------|-------------|--------------------------------------|-------------|--------------------------------------------------------|-----------------|----------------------|--------------------------------|----------------------|--------------------|-------------------------|
| [1]  | Adamsen 2009            | Denmark        | Mixed       | Breast                               | During      | EORTC-Fatigue                                          | Control         | 134 (117)            | Combined                       | 135 (118)            |                    |                         |
| [2]  | Ahles 1999              | USA            | HSCT        |                                      | During      | NRS                                                    | Control         | 18 (17)              | Massage                        | 16 (16)              |                    |                         |
| [3]  | Al-Majid 2015           | USA            | Breast      |                                      | During      | Revised Piper Fatigue Scale                            | Control         | 7 (7)                | Aerobic                        | 7 (7)                |                    |                         |
| [4]  | Alibhai 2014            | Canada         | AML         |                                      | After       | FACT-F                                                 | Control         | 18 (17)              | Combined                       | 22 (19)              |                    |                         |
| [5]  | Alibhai 2015            | Canada         | AML         |                                      | During      | FACT-F                                                 | Control         | 24 (20)              | Combined                       | 59 (50)              |                    |                         |
| [6]  | Andersen 2013           | Denmark        | Mixed       | Breast                               | During      | FACT-AN Fatigue Subscore                               | Control         | 134 (107)            | Combined                       | 135 (106)            |                    |                         |
| [7]  | Armes 2007              | UK             | Mixed       | Colon                                | During      | VAS-F                                                  | Control         | 27 (22)              | CBT_PsychoSocial               | 28 (22)              |                    |                         |
| [8]  | Backman 2014            | Sweden         | Mixed       | Breast                               | During      | EORTC QLQC30 Fatigue                                   | Control         | 36 (33)              | Aerobic                        | 35 (34)              |                    |                         |
| [9]  | Badger 2011             | USA            | Prostate    |                                      | After       | MFI                                                    | Control         | 35 (34)              | CBT_PsychoSocial               | 36 (34)              |                    |                         |
| [10] | Baker 2012              | UK             | Breast      |                                      | During      | POMS                                                   | Control         | 6 (6)                | CBT_PsychoSocial               | 6 (6)                |                    |                         |
| [11] | Banasik 2011            | USA            | Breast      | Breast                               | After       | Fatigue Score                                          | Control         | 9 (7)                | Yoga                           | 9 (7)                |                    |                         |
| [12] | Bantum 2014             | USA            | Mixed       | Breast                               | After       | BFI                                                    | Control         | 176 (156)            | CBT_PsychoSocial               | 176 (147)            |                    |                         |
| [13] | Bargi 2016              | Turkey         | HSCT        |                                      | After       | FIS                                                    | Control         | 27 (18)              | Inspiratory Muscle<br>Training | 28 (20)              |                    |                         |
| [14] | Barsevick 2004          | USA            | Mixed       | Breast                               | During      | POMS-F                                                 | Control         | 196 (196)            | CBT_PsychoSocial               | 200 (200)            |                    |                         |
| [15] | Barsevick 2010          | USA            | Mixed       |                                      | During      | POMS-F                                                 | Control         | 139 (134)            | CBT_PsychoSocial               | 153 (142)            |                    |                         |
| [16] | Basen-Enquist 2006      | USA            | Breast      |                                      | After       | SF-36-vitality                                         | Control         | 25 (23)              | CBT_PsychoSocial               | 35 (28)              |                    |                         |
| [17] | Battaglini 2006         | USA            | Breast      |                                      | During      | Piper                                                  | Control         | 10 (10)              | Combined                       | 10 (10)              |                    |                         |
| [18] | Baumann 2010            | Germany        | HSCT        |                                      | During      | EORTC QLQ-C30                                          | Control         | 32 (25)              | Combined                       | 32 (24)              |                    |                         |
| [19] | Baumann 2011            | Germany        | HSCT        |                                      | During      | EORTC QLQ-C 30                                         | Control         | 23 (16)              | Combined                       | 24 (17)              |                    |                         |
| [20] | Bennett 2007            | New<br>Zealand | Mixed       | Breast                               | After       | Schwartz Cancer Fatigue Scale                          | Control         | 28 (26)              | CBT_PsychoSocial               | 28 (20)              |                    |                         |
| [21] | Berglund 1994           | Sweden         | Mixed       | Breast                               | After       | Physical Strength and Activity<br>Subscale "Tiredness" | Control         | 101 (95)             | Combined                       | 98 (89)              |                    |                         |
| [22] | Boesen 2005             | Denmark        | Melanoma    |                                      | After       | POMS CHANGE                                            | Control         | 131 (129)            | CBT_PsychoSocial               | 131 (112)            |                    |                         |
| [23] | Bourke 2011 Feasibility | UK             | Prostate    |                                      | After       | FACT-F                                                 | Control         | 25 (22)              | Combined                       | 25 (21)              |                    |                         |
| [24] | Bourke 2011 pilot       | UK             | Colorectal  |                                      | After       | FACT-F                                                 | Control         | 9 (9)                | Combined                       | 9 (8)                |                    |                         |
| [25] | Bourke 2014             | UK             | Mixed       |                                      | After       | FACT-F                                                 | Control         | 50 (43)              | Combined                       | 50 (43)              |                    |                         |
| [26] | Bower 2012              | USA            | Breast      |                                      | After       | SFI Fatigue Symptom Inventory                          | Control         | 15 (15)              | Yoga                           | 16 (16)              |                    |                         |
| [27] | Bower 2015              | USA            | Breast      |                                      | After       | FSI                                                    | Control         | 32 (30)              | CBT_Psychosocial               | 39 (35)              |                    |                         |
| [28] | Bridge 1988             | UK             | Breast      |                                      | During      | POMS-Fatigue                                           | Control         | 48 (46)              | Relaxation                     | 91 (82)              |                    |                         |
| [29] | Broderick 2013          | Ireland        | Mixed       | Breast                               | After       | FACIT-F                                                | Control         | 20 (19)              | Aerobic                        | 23 (21)              |                    |                         |
| [30] | Brown 2006              | USA            | Mixed       | Gastrointestinal                     | During      | POMS-Fatigue                                           | Control         | 58 (54)              | CombinedCBT                    | 57 (49)              |                    |                         |
| [31] | Burnham 2002            | USA            | Mixed       | Breast                               | After       | LASA Fatigue                                           | Control         | 7 (6)                | Aerobic                        | 14 (12)              |                    |                         |

| Nr   | study                        | Country   | Cancer-type      | Main-cancer<br>(in mixed<br>studies) | Time period | Treatment arm 1             | Treatment arm 2 | Sample size arm<br>1 | Treatment arm 2  | Sample size<br>arm 2 | Treatment<br>arm 3 | Sample<br>Size arm<br>3 |
|------|------------------------------|-----------|------------------|--------------------------------------|-------------|-----------------------------|-----------------|----------------------|------------------|----------------------|--------------------|-------------------------|
| [32] | Cadmus 2009 Impact           | USA       | Breast           |                                      | During      | SF-36 vitality              | Control         | 25 (25)              | Aerobic          | 25 (25)              |                    |                         |
| [33] | Cadmus 2009 Yes              | USA       | Breast           |                                      | After       | SF-36 vitality              | Control         | 38 (37)              | Aerobic          | 37 (37)              |                    |                         |
| [34] | Caldwell 2009                | USA       | Breast           |                                      | During      | SCFS Fatigue                | Control         | 10 (9)               | Combined         | 12 (8)               |                    |                         |
| [35] | Campbell 2005                | UK        | Breast           |                                      | During      | Revised Piper Fatigue Scale | Control         | 10 (9)               | Combined         | 12 (10)              |                    |                         |
| [36] | Campo 2013                   | USA       | Mixed            | Breast                               | After       | SF-36 vitality              | Control         | 31 (25)              | TaiChi           | 32 (29)              |                    |                         |
| [37] | Campo 2014                   | USA       | Prostate         |                                      | After       | FACIT-F                     | Relaxation      | 20 (13)              | TaiChi           | 20 (16)              |                    |                         |
| [38] | Cantarero-Villanueva<br>2011 | Spain     | Breast           |                                      | After       | PFS                         | Control         | 40 (35)              | Combined         | 38 (32)              |                    |                         |
| [39] | Cantarero-Villanueva<br>2013 | Spain     | Breast           |                                      | After       | Piper Fatigue Scale         | Control         | 34 (29)              | Aerobic          | 34 (32)              |                    |                         |
| [40] | Carson 2009                  | USA       | Breast           |                                      | After       | Fatigue scale               | Control         | 20 (17)              | Yoga             | 16 (13)              |                    |                         |
| [41] | Cerulli 2014                 | Italy     | Breast           |                                      | After       | FACIT-F                     | Control         | 10 (10)              | Aerobic          | 10 (10)              |                    |                         |
| [42] | Chakrabarty 2014             | India     | Breast           |                                      | During      | Cancer Fatigue Scale        | Control         | 80 (80)              | Yoga             | 80 (80)              |                    |                         |
| [43] | Chan 2011                    | China     | Lung             |                                      | During      | Piper Fatigue Scale         | Control         | 70 (59)              | CBT_PsychoSocial | 70 (68)              |                    |                         |
| [44] | Chan 2016                    | Singapore | Breast           |                                      | After       | QLQ-C30 Fatigue             | Control         | 43 (38)              | CBT_Psychosocial | 45 (34)              |                    |                         |
| [45] | Chandwani 2010               | USA       | Breast           |                                      | During      | BFI Fatigue                 | Control         | 31 (31)              | Yoga             | 30 (27)              |                    |                         |
| [46] | Chandwani 2014               | USA       | Breast           |                                      | During      | Brief Fatigue Inventory     | Control         | 54 (48)              | Yoga             | 53 (49)              | Relaxation         | 56<br>(52)              |
| [47] | Chang 2008                   | China     | AML              |                                      | During      | BFI                         | Control         | 12 (11)              | Aerobic          | 12 (11)              |                    |                         |
| [48] | Chen 2011                    | China     | Head and Neck    |                                      | After       | R-PFS                       | Control         | ? (28)               | Aerobic          | ? (28)               |                    |                         |
| [49] | Chen 2013                    | China     | Breast           |                                      | During      | BFI                         | Control         | 47 (47)              | TaiChi           | 49 (49)              |                    |                         |
| [50] | Cheville 2013                | USA       | Mixed            |                                      | After       | FACT-F                      | Control         | 33 (29)              | Combined         | 33 (26)              |                    |                         |
| [51] | Choi 2012                    | Korea     | Gastrointestinal |                                      | During      | Schwartz Fatigue Scale      | Control         | 13 (13)              | Aerobic          | 11 (11)              |                    |                         |
| [52] | Clark 2006                   | USA       | Mixed            | Head & Neck &<br>Breast              | During      | POMS                        | Control         | 28 (21)              | Music            | 35 (28)              |                    |                         |
| [53] | Classen 2001                 | USA       | Breast           |                                      | After       | POMS                        | Control         | 61 (36)              | CBT_PsychoSocial | 64 (53)              |                    |                         |
| [54] | Cohen 2004                   | USA       | Lymphoma         |                                      | After       | BFI                         | Control         | 19 (19)              | Yoga             | 20 (20)              |                    |                         |
| [55] | Coleman 2012                 | USA       | Multiple myeloma |                                      | During      | FACT-F                      | Control         | 75 (61)              | Combined         | 91 (80)              |                    |                         |
| [56] | Cormie 2013                  | Australia | Prostate         |                                      | After       | MFSI-SF                     | Control         | 10 (10)              | Resistance       | 10 (10)              |                    |                         |
| [57] | Cormie 2015                  | Australia | Prostate         |                                      | After       | FACT-F                      | Control         | 31 (31)              | Combined         | 32 (32)              |                    |                         |
| [58] | Cornette 2015                | France    | Breast           |                                      | During      | MFI-20                      | Control         | 22 (16)              | Combined         | 22 (19)              |                    |                         |
| [59] | Courneya 2009                | Canada    | Lymphoma         |                                      | During      | FACIT-F                     | Control         | 62 (62)              | Aerobic          | 60 (60)              |                    |                         |
| [60] | Courneya 2003a               | Canada    | Colorectal       |                                      | During      | FACT-F                      | Control         | 33 (31)              | Aerobic          | 69 (62)              |                    |                         |
| [61] | Courneya 2003b               | Canada    | Breast           |                                      | After       | FACT-F                      | Control         | 28 (26)              | Aerobic          | 25 (25)              |                    |                         |
| [62] | Courneya 2003c               | Canada    | Mixed            | Breast                               | After       | FACT-Fatigue                | Control         | 48 (45)              | Aerobic          | 60 (51)              |                    |                         |
| [63] | Courneya 2007                | Canada    | Breast           |                                      | During      | Fact Fatigue (AN)           | Control         | 82 (73)              | Resistance       | 82 (76)              | Aerobic            | 78<br>(74)              |

| Nr   | study                  | Country   | Cancer-type    | Main-cancer<br>(in mixed<br>studies) | Time period | Treatment arm 1               | Treatment arm 2 | Sample size arm<br>1 | Treatment arm 2  | Sample size<br>arm 2 | Treatment<br>arm 3 | Sample<br>Size arm<br>3 |
|------|------------------------|-----------|----------------|--------------------------------------|-------------|-------------------------------|-----------------|----------------------|------------------|----------------------|--------------------|-------------------------|
| [64] | Courneya 2008          | Canada    | Solid tumours  |                                      | During      | Fact Fatigue (AN)             | Control         | 29 (29)              | Aerobic          | 26 (26)              |                    |                         |
| [65] | Cramer 2015            | Germany   | Breast         |                                      | After       | FACIT-F                       | Control         | 21 ( )               | Yoga             | 19 ( )               |                    |                         |
| [66] | Cramer colorectal 2015 | Germany   | Colorectal     |                                      | After       | FACIT-F                       | Control         | 27 (27)              | Yoga             | 27 (27)              |                    |                         |
| [67] | Culos-Reed 2006        | Canada    | Breast         |                                      | After       | Perceived exertion            | Control         | 18 (18)              | Yoga             | 20 (18)              |                    |                         |
| [68] | Culos-Reed 2010        | Canada    | Prostate       |                                      | After       | FSS                           | Control         | 47 (24)              | Combined         | 53 (37)              |                    |                         |
| [69] | Daley 2007             | UK        | Breast         |                                      | After       | revised Piper Fatigue Scale   | Control         | 38 (33)              | Aerobic          | 34 (33)              |                    |                         |
| [70] | Danaher Hacker 2011    | USA       | HSCT           |                                      | During      | EORTC QLQ-C30 Fatigue         | Control         | 10 (9)               | Resistance       | 9 (8)                |                    |                         |
| [71] | Danhauer 2009          | USA       | Breast         |                                      | After       | FACT Fatigue                  | Control         | 22 (14)              | Yoga             | 22 (13)              |                    |                         |
| [72] | De Luca 2016           | Italy     | Breast         |                                      | After       | FACT-F                        | Control         | 10 (10)              | Combined         | 10 (10)              |                    |                         |
| [73] | Decker 1992            | USA       | Mixed          | Breast                               | During      | POMS Fatigue                  | Control         | 29 (29)              | Relaxation       | 34 (34)              |                    |                         |
| [74] | Dhruva 2012            | USA       | Mixed          | Breast                               | During      | PFS                           | Control         | 23 (8)               | Yoga             | 23 (8)               |                    |                         |
| [75] | Dibbel-Hope 1989       | USA       | Breast         |                                      | After       | POMS                          | Control         | 17 (16)              | Dance            | 16 (15)              |                    |                         |
| [76] | Dimeo 1999             | Germany   | Mixed          | Breast                               | During      | POMS Fatigue                  | Control         | 33 (32)              | Aerobic          | 29 (27)              |                    |                         |
| [77] | Dimeo 2004             | Germany   | Mixed          | Lung                                 | After       | EORTC-QLQ Fatigue             | Relaxation      | 36 (35)              | Aerobic          | 36 (34)              |                    |                         |
| [78] | Do 2015                | Korea     | Breast         |                                      | After       | FSS                           | Control         | 106 (30)             | Combined         | 106 (32)             |                    |                         |
| [79] | Dodd 2010              | USA       | Mixed          |                                      | During      | Piper Fatigue Scale           | Control         | 39 (37)              | Aerobic          | 44 (37)              |                    |                         |
| [80] | Dodds 2016             | USA       | Breast         |                                      | After       | SF-12 vitality                | Control         | 17 (16)              | CBT_PsychoSocial | 16 (12)              |                    |                         |
| [81] | Dolbeault 2009         | France    | Breast         |                                      | After       | POMS-Fatigue                  | Control         | 101 (87)             | CBT_PsychoSocial | 102 (81)             |                    |                         |
| [82] | Donnelly 2011          | Ireland   | Gynaecological |                                      | After       | MFSI-SF                       | Control         | 17 (17)              | CombinedCBT      | 16 (16)              |                    |                         |
| [83] | Drouin 2005            | USA       | Breast         |                                      | During      | revised Piper Fatigue Scale   | Control         | 8 (8)                | Aerobic          | 13 (13)              |                    |                         |
| [84] | Eakin 2012             | Australia | Breast         |                                      | After       | Eakin 2012                    | Control         | 70 (69)              | Combined         | 73 (70)              |                    |                         |
| [85] | Edelman 1999           | Australia | Breast         |                                      | During      | POMS Fatigue                  | Control         | 62 (49)              | CBT_PsychoSocial | 62 (43)              |                    |                         |
| [86] | Ergun 2013             | Turkey    | Breast         |                                      | After       | Brief Fatigue Inventory       | Control         | 20 (20)              | Aerobic          | 20 (20)              | Combined           | 20<br>(20)              |
| [87] | Eyigor 2010            | Turkey    | Breast         |                                      | After       | BFI                           | Control         | 25 (15)              | Resistance       | 27 (27)              |                    |                         |
| [88] | Ferguson 2016          | USA       | Breast         |                                      | After       | FACT-F                        | Control         | 20 (13)              | CBT_PsychoSocial | 27 (22)              |                    |                         |
| [89] | Fillion 2008           | Canada    | Breast         |                                      | After       | MFI                           | Control         | 46 (43)              | CombinedCBT      | 48 (44)              |                    |                         |
| [90] | Foster 2015            | UK        | Mixed          |                                      | After       | BFI                           | Control         | 78 (70)              | CBT_PsychoSocial | 85 (58)              |                    |                         |
| [91] | Freeman 2015           | USA       | Breast         |                                      | After       | FACIT-F                       | Control         | 47 (44)              | CTB_PsychoSocial | 71 (60)              |                    |                         |
| [92] | Fukui 2000             | Japan     | Breast         |                                      | After       | POMS Fatigue                  | Control         | 25 (25)              | CBT_PsychoSocial | 25 (25)              |                    |                         |
| [93] | Furzer 2015            | Australia | Haematological |                                      | After       | Schwartz Cancer Fatigue Scale | Control         | 22 (18)              | Combined         | 22 (19)              |                    |                         |
| [94] | Galiano-Castill 2016   | Spain     | Breast         |                                      | After       | Piper Fatigue Scale           | Control         | 41 (36)              | Combined         | 40 (36)              |                    |                         |
| [95] | Galvao 2010            | Australia | Prostate       |                                      | After       | QLQ-C30 Fatigue               | Control         | 28 (28)              | Combined         | 29 (29)              |                    |                         |

| Nr    | study           | Country     | Cancer-type      | Main-cancer<br>(in mixed<br>studies) | Time period | Treatment arm 1               | Treatment arm 2  | Sample size arm<br>1 | Treatment arm 2  | Sample size<br>arm 2 | Treatment<br>arm 3 | Sample<br>Size arm<br>3 |
|-------|-----------------|-------------|------------------|--------------------------------------|-------------|-------------------------------|------------------|----------------------|------------------|----------------------|--------------------|-------------------------|
| [96]  | Galvao 2014     | Australia   | Prostate         |                                      | After       | SF36-Vitality                 | Aerobic          | 50 (50)              | Combined         | 50 (50)              |                    |                         |
| [97]  | Garssen 2013    | Netherlands | Breast           |                                      | During      | POMS Fatigue                  | Control          | 43 (36)              | CBT_PsychoSocial | 42 (34)              |                    |                         |
| [98]  | Gielissen 2006  | Netherlands | Mixed            |                                      | After       | Checklist Individual Strength | Control          | 56 (48)              | CBT_PsychoSocial | 56 (50)              |                    |                         |
| [99]  | Goedendorp 2010 | Netherlands | Mixed            | Breast                               | During      | CIS-F                         | Control          | 81 (72)              | Aerobic          | 77 (72)              | CombinedCBT        | 82<br>(76)              |
| [100] | Gokal 2015      | UK          | Breast           |                                      | During      | FACT-F                        | Control          | 25 (25)              | Aerobic          | 25 (20)              |                    |                         |
| [101] | Goodwin 2001    | Canada      | Breast           |                                      | During      | POMS Fatigue CHANGE           | Control          | 77 (45)              | CBT_PsychoSocial | 158 (102)            |                    |                         |
| [102] | Hacker 2016     | USA         | HSCT             |                                      | During      | Chalder Fatigue Scale         | Control          | 38 (34)              | Resistance       | 37 (33)              |                    |                         |
| [103] | Hagstrom 2016   | Australia   | Breast           |                                      | After       | FACIT                         | Control          | 19 (19)              | Resistance       | 20 (20)              |                    |                         |
| [104] | Haines 2010     | Australia   | Breast           |                                      | During      | MFI 3month                    | Relaxation       | 43 (36)              | Combined         | 46 (35)              |                    |                         |
| [105] | Hawkes 2013     | Australia   | Colorectal       |                                      | After       | FACIT-F                       | Control          | 205 (176)            | CombinedCBT      | 205 (171)            |                    |                         |
| [106] | Hayama 2012     | Japan       | Gynaecological   |                                      | During      | Cancer Fatigue Scale          | Control          | 13 (12)              | Relaxation       | 12 (11)              |                    |                         |
| [107] | Hayes 2013      | Australia   | Breast           |                                      | After       | FACIT-F                       | Control          | 60 (60)              | Combined         | 134 (134)            |                    |                         |
| [108] | Heim 2007       | Germany     | Breast           |                                      | After       | FACT-F                        | Control          | 31 (31)              | Combined         | 32 (32)              |                    |                         |
| [109] | Heiney 2015     | USA         | Breast           |                                      | During      | POMS-SF                       | Control          | 93 (86)              | Dance            | 92 (82)              |                    |                         |
| [110] | Ho 2016         | China       | Breast           |                                      | During      | BFI                           | Control          | 75 (70)              | Dance            | 72 (69)              |                    |                         |
| [111] | Hoffman 2012    | UK          | Breast           |                                      | After       | POMS-Fatigue                  | Control          | 115 (111)            | CBT_PsychoSocial | 114 (103)            |                    |                         |
| [112] | Hoffman 2017    | USA         | Lung             |                                      | During      | BFI                           | Control          | 40 (35)              | Aerobic          | 47 (37)              |                    |                         |
| [113] | Hojan 2016      | Poland      | Prostate         |                                      | During      | FACT-F                        | Control          | 28 (27)              | Aerobic          | 27 (27)              |                    |                         |
| [114] | Hornsby 2014    | USA         | Breast           |                                      | During      | FACIT-F                       | Control          | 10 (10)              | Aerobic          | 10 (9)               |                    |                         |
| [115] | Hu 2012         | China       | Nasopharyngeal   |                                      | During      | BFI                           | Control          | ? (40)               | Aerobic          | ? (40)               |                    |                         |
| [116] | Hubbard 2016    | UK          | Bowel            |                                      | After       | FACIT-F                       | Control          | 20 (16)              | CombinedCBT      | 20 (15)              |                    |                         |
| [117] | Husebo 2014     | Norway      | Breast           |                                      | During      | Schwartz Cancer Fatigue Sc.   | Control          | 34 (31)              | Combined         | 33 (29)              |                    |                         |
| [118] | Hwang 2008      | Korea       | Breast           |                                      | During      | BFI                           | Control          | 20 (20)              | Combined         | 17 (17)              |                    |                         |
| [119] | Hwang 2012      | China       | Lung             |                                      | During      | EORTC-QLQ-C30                 | Control          | 12 (11)              | Aerobic          | 12 (13)              |                    |                         |
| [120] | Inwin 2016      | USA         | Breast           |                                      | After       | FACT-F                        | Control          | 91 (83)              | Combined         | 95 (81)              |                    |                         |
| [121] | Jacobsen 2002   | USA         | Breast           |                                      | During      | SF-36 Vitality CHANGE         | CBT_PsychoSocial | 137 (104)            | Relaxation       | 274 (216)            |                    |                         |
| [122] | Jarden 2009     | Denmark     | HSCT             |                                      | During      | FACT-AN (Fatigue)             | Control          | 21 (17)              | CombinedCBT      | 21 (17)              |                    |                         |
| [123] | Jensen 2014     | Germany     | Gastrointestinal |                                      | After       | EORTC-QLQ-C30 Fatigue         | Resistance       | 11 (11)              | Aerobic          | 10 (10)              |                    |                         |
| [124] | Johns 2014      | USA         | Breast           |                                      | After       | FSI Fatigue Severity          | Control          | 17 (17)              | CBT_PsychoSocial | 18 (18)              |                    |                         |
| [125] | Johnston 2011   | USA         | Breast           |                                      | After       | BFI                           | Control          | 7 (7)                | CBT_PsychoSocial | 6 (5)                |                    |                         |
| [126] | Jones 2014      | USA         | Prostate         |                                      | After       | FACT-F                        | Control          | 25 (20)              | Aerobic          | 25 (15)              |                    |                         |
| [127] | Korstjens 2008  | Netherlands | Mixed            |                                      | After       | SF-36 Vitality                | Control          | 62 (62)              | Combined         | 71 (71)              | CombinedCBT        | 76<br>(76)              |

| Nr    | study               | Country         | Cancer-type           | Main-cancer<br>(in mixed<br>studies) | Time period | Treatment arm 1               | Treatment arm 2 | Sample size arm<br>1 | Treatment arm 2             | Sample size<br>arm 2 | Treatment<br>arm 3 | Sample<br>Size arm<br>3 |
|-------|---------------------|-----------------|-----------------------|--------------------------------------|-------------|-------------------------------|-----------------|----------------------|-----------------------------|----------------------|--------------------|-------------------------|
| [128] | Kampshoff 2015      | The Netherlands | Mixed                 |                                      | After       | MFI                           | Control         | 91 (91)              | Combined                    | 186 (186)            |                    |                         |
| [129] | Kiecolt-Glaser 2014 | USA             | Breast                |                                      | After       | MFSI-SF Fatigue               | Control         | 100 (90)             | Yoga                        | 100 (96)             |                    |                         |
| [130] | Kim 2005            | Korea           | HSCT                  |                                      | During      | Piper Fatigue Scale           | Control         | 17 (17)              | Relaxation                  | 18 (18)              |                    |                         |
| [131] | Kim 2010            | Korea           | Breast                |                                      | After       | SF-36 vitality                | Control         | 20 (20)              | Resistance                  | 20 (20)              |                    |                         |
| [132] | Kim 2011            | Korea           | Breast                |                                      | After       | BFI                           | Control         | 22 (22)              | CombinedCBT                 | 23 (23)              |                    |                         |
| [133] | Kim 2013            | Korea           | Breast                |                                      | During      | Piper Fatigue Scale           | Control         | 51 (51)              | Relaxation                  | 51 (51)              |                    |                         |
| [134] | Knols 2011          | Switzerland     | HSCT                  |                                      | After       | FACT-AN                       | Control         | 67 (57)              | Combined                    | 64 (57)              |                    |                         |
| [135] | Kovacs 2012         | Hungary         | Breast                |                                      | During      | EORTC Fatigue                 | Control         | 87 (87)              | CombinedCBT                 | 86 (36)              |                    |                         |
| [136] | Kwiatkowski 2013    | France          | Breast                |                                      | After       | SF-36 vitality                | Control         | 115 (108)            | Combined                    | 117 (114)            |                    |                         |
| [137] | Larkey 2015         | USA             | Breast                |                                      | After       | Fatigue Symptom Inventory     | Control         | 52 (44)              | TaiChi                      | 49 (40)              |                    |                         |
| [138] | Lengacher 2012      | USA             | Breast                |                                      | After       | Fatigue Severity Scale        | Control         | 43 (42)              | CBT_PsychoSocial            | 41 (40)              |                    |                         |
| [139] | Lengacher 2016      | USA             | Breast                |                                      | After       | FSI                           | Control         | 155 (147)            | CBT_Psychosocial            | 167 (152)            |                    |                         |
| [140] | Ligibel 2012        | USA             | Mixed                 | Breast                               | After       | FACIT-F                       | Control         | 60 (51)              | Aerobic                     | 61 (48)              |                    |                         |
| [141] | Ligibel 2016        | USA             | Breast                |                                      | During      | FACIT-F                       | Control         | 53 (43)              | Aerobic                     | 48 (32)              |                    |                         |
| [142] | Litterini 2013      | USA             | Mixed                 | Breast                               | After       | Fatigue VAS 100mm             | Aerobic         | 32 (29)              | Resistance                  | 34 (23)              |                    |                         |
| [143] | Littman 2012        | USA             | Breast                |                                      | After       | FACIT-F                       | Control         | 31 (27)              | Yoga                        | 32 (30)              |                    |                         |
| [144] | Loh 2014            | Kuala-Lumpur    | Breast                |                                      | After       | FACIT-F                       | Control         | 66 (32)              | Dance                       | 65 (34)              | TaiChi             | 66 (32)                 |
| [145] | Loudon 2014         | Australia       | Breast                |                                      | After       | VAS                           | Control         | 13 (11)              | Yoga                        | 15 (12)              |                    |                         |
| [146] | Lutgendorf 2010     | USA             | Gynaecological        |                                      | During      | FSI                           | Control         | 19 (17)              | HealingTouch_Polarity       | 21 (17)              | Relaxation         | 20 (17)                 |
| [147] | Lötzke 2016         | Germany         | Breast                |                                      | During      | EORTC QLQ-C30 Fatigue         | Yoga            | 45 (43)              | Combined                    | 47 (46)              |                    |                         |
| [148] | May 2009            | Netherlands     | Mixed                 | Breast                               | After       | EORTC-QLQ-30 Fatigue          | CombinedCBT     | 76 (70)              | Combined                    | 71 (66)              |                    |                         |
| [149] | McKenzie 2003       | Canada          | Breast                |                                      | After       | Vitality                      | Control         | 7 (7)                | Combined                    | 7 (7)                |                    |                         |
| [150] | McNeely 2008        | Canada          | Head and Neck         |                                      | After       | FACT-An                       | Control         | 27 (27)              | Resistance                  | 25 (25)              |                    |                         |
| [151] | McQuade 2016        | USA             | Prostate              |                                      | During      | BFI                           | Control         | 24 (22)              | TaiChi                      | 26 (21)              | Resistance (19)    | 26                      |
| [152] | Mehnert 2011        | Germany         | Breast                |                                      | After       | EORTC-Q                       | Control         | 28 (27)              | Aerobic                     | 35 (30)              |                    |                         |
| [153] | Midtgaard 2013      | Denmark         | Mixed                 | Breast                               | After       | EORTC QLQ-C30                 | Control         | 106 (80)             | CombinedCBT                 | 108 (73)             |                    |                         |
| [154] | Miladina 2017       | Iran            | AML                   |                                      | During      | NRS Fatigue                   | Control         | 31 (30)              | Massage                     | 33 (30)              |                    |                         |
| [155] | Milne 2008          | Australia       | Breast                |                                      | After       | Schwartz Cancer Fatigue Scale | Control         | 29 (29)              | Combined                    | 29 (29)              |                    |                         |
| [156] | Moadel 2007         | USA             | Breast                |                                      | After       | FACIT-F                       | Control         | 56 (44)              | Yoga                        | 108 (84)             |                    |                         |
| [157] | Mock 2005           | USA             | Breast                |                                      | During      | Piper Fatigue Scale           | Control         | 59 (54)              | Aerobic                     | 60 (54)              |                    |                         |
| [158] | Molassiotis 2015    | UK / Cyprus     | Thoracic Malignancies |                                      | After       | CRDQ-Fatigue                  | Control         | 23 (18)              | Inspiratory Muscle Training | 24 (18)              |                    |                         |
| [159] | Monga 2007          | USA             | Prostate              |                                      | During      | Piper Fatigue Scale           | Control         | 10 (10)              | Aerobic                     | 11 (11)              |                    |                         |

| Nr    | study             | Country     | Cancer-type            | Main-cancer (in mixed studies) | Time period | Treatment arm 1                    | Treatment arm 2 | Sample size arm 1 | Treatment arm 2       | Sample size arm 2 | Treatment arm 3 | Sample Size arm 3 |
|-------|-------------------|-------------|------------------------|--------------------------------|-------------|------------------------------------|-----------------|-------------------|-----------------------|-------------------|-----------------|-------------------|
| [160] | Montgomery 2014   | USA         | Breast                 |                                | During      | FACIT-F                            | Control         | 100 (96)          | CBT_PsychoSocial      | 100 (95)          |                 |                   |
| [161] | Moros 2010        | Spain       | Breast                 |                                | During      | EORTC-30                           | Control         | 11 (7)            | Aerobic               | 11 (10)           |                 |                   |
| [162] | Mustian 2009      | USA         | Mixed                  | Breast                         | During      | FACIT-F                            | Control         | 19 (19)           | Combined              | 19 (19)           |                 |                   |
| [163] | Mustian 2011      | USA         | Breast                 |                                | During      | Brief Fatigue Inventory            | Control         | 15 (15)           | HealingTouch_Polarity | 13 (13)           | Massage         | 15 (15)           |
| [164] | Mutrie 2007       | UK          | Breast                 |                                | During      | FACT-F                             | Control         | 102 (92)          | Combined              | 101 (82)          |                 |                   |
| [165] | Naraphong 2014    | Thailand    | Breast                 |                                | During      | Piper Fatigue Scale                | Control         | 12 (12)           | Aerobic               | 11 (10)           |                 |                   |
| [166] | O'Brien 2013      | Australia   | Mixed                  | Breast                         | During      | FACT-F                             | Control         | 15 (13)           | CBT_PsychoSocial      | 15 (14)           |                 |                   |
| [167] | Oh 2008           | Australia   | Mixed                  |                                | During      | EORTC-30 Fatigue                   | Control         | 15 (10)           | TaiChi                | 15 (8)            |                 |                   |
| [168] | Oh 2010           | Australia   | Mixed                  |                                | After       | FACT-F                             | Control         | 83 (83)           | TaiChi                | 79 (79)           |                 |                   |
| [169] | Oldervoll 2011    | Norway      | Mixed                  |                                | After       | Multidimensional Fatigue Inventory | Control         | 110 (110)         | Combined              | 121 (121)         |                 |                   |
| [170] | Pinto 2003        | USA         | Breast                 |                                | After       | POMS-Fatigue                       | Control         | 12 (6)            | Aerobic               | 12 (12)           |                 |                   |
| [171] | Pinto 2005        | USA         | Breast                 |                                | After       | Linear analogue fatigue scale      | Control         | 43 (41)           | Aerobic               | 43 (43)           |                 |                   |
| [172] | Pinto 2013 Breast | USA         | Breast                 |                                | After       | FACT-F                             | Control         | 86 (84)           | Aerobic               | 106 (89)          |                 |                   |
| [173] | Pinto 2013        | USA         | Colorectal             |                                | After       | FACT-F                             | Control         | 26 (24)           | Aerobic               | 20 (19)           |                 |                   |
| [174] | Pinto 2015        | USA         | Breast                 |                                | After       | FACIT-F                            | Control         | 37 (37)           | Aerobic               | 39 (39)           |                 |                   |
| [175] | Poorkiani 2010    | Iran        | Breast                 |                                | After       | EORTC QLQ-C30                      | Control         | 33 (30)           | CombinedCBT           | 33 (27)           |                 |                   |
| [176] | Post-White 2003   | USA         | Mixed                  | Breast                         | During      | POMS-Fatigue                       | Control         | 75 (45)           | HealingTouch_Polarity | 77 (56)           | Massage         | 78 (62)           |
| [177] | Prinsen 2013      | Netherlands | Mixed                  |                                | After       | Checklist Individual Strength      | Control         | 14 (14)           | CombinedCBT           | 50 (23)           |                 |                   |
| [178] | Pruthi 2012       | USA         | Breast                 |                                | During      | Brief Fatigue Inventory            | Control         | 15 (14)           | Yoga                  | 15 (14)           |                 |                   |
| [179] | Purcell 2011      | Australia   | Mixed                  | Breast & prostate              | During      | MFI                                | Control         | 28 (24)           | CBT_PsychoSocial      | 27 (21)           |                 |                   |
| [180] | Rabin 2012        | USA         | Breast                 |                                | After       | POMS Fatigue                       | Control         | 10 (10)           | Aerobic               | 8 (7)             |                 |                   |
| [181] | Rahmani 2015      | Iran        | Breast                 |                                | During      | Fatigue Severity Scale             | Control         | 12 (12)           | CombinedCBT           | 12 (12)           |                 |                   |
| [182] | Rauchfuß 2010     | Germany     | Breast                 |                                | After       | SF-8 Vitality                      | Control         | 36 (29)           | Massage               | 50 (43)           |                 |                   |
| [183] | Ream 2006         | UK          | Mixed                  | Breast                         | During      | Global measure of Fatigue          | Control         | 55 (43)           | CBT_PsychoSocial      | 48 (43)           |                 |                   |
| [184] | Ream 2015         | UK          | Breast                 | Colorectal                     | During      | BFI                                | Control         | 21 (20)           | CBT_Psychosocial      | 23 (18)           |                 |                   |
| [185] | Reich 2014        | USA         | Breast                 |                                | After       | MDASI Fatigue                      | Control         | 24 (24)           | CBT_PsychoSocial      | 17 (17)           |                 |                   |
| [186] | Reif 2013         | Germany     | Mixed                  |                                | After       | Fatigue Assessment Questionnaire   | Control         | 129 (114)         | CBT_PsychoSocial      | 132 (120)         |                 |                   |
| [187] | Reis 2013         | USA         | Breast                 |                                | During      | FACIT-F                            | Control         | 19 (17)           | Aerobic               | 22 (12)           |                 |                   |
| [188] | Rief 2014         | Germany     | Spinal Bone metastases |                                | During      | EORTC QLQ FA13                     | Control         | 30 (22)           | Resistance            | 30 (25)           |                 |                   |
| [189] | Rogers 2009       | USA         | Breast                 |                                | After       | FACT-F                             | Control         | 20 (17)           | Aerobic               | 21 (20)           |                 |                   |
| [190] | Rogers 2013       | USA         | Head and Neck          |                                | During      | FACT-F                             | Control         | 8 (8)             | Resistance            | 7 (7)             |                 |                   |
| [191] | Rogers 2014       | USA         | Breast                 |                                | After       | Fatigue Symptom Inventory          | Control         | 24 (22)           | Combined              | 22 (20)           |                 |                   |

| Nr    | study                | Country         | Cancer-type | Main-cancer<br>(in mixed studies) | Time period | Treatment arm 1                     | Treatment arm 2 | Sample size arm 1 | Treatment arm 2  | Sample size arm 2 | Treatment arm 3 | Sample Size arm 3 |
|-------|----------------------|-----------------|-------------|-----------------------------------|-------------|-------------------------------------|-----------------|-------------------|------------------|-------------------|-----------------|-------------------|
| [192] | Rogers 2016          | USA             | Breast      |                                   | After       | FSI                                 | Control         | 112 (109)         | Aerobic          | 110 (110)         |                 |                   |
| [193] | Saarto 2012          | Finland         | Breast      |                                   | After       | FACIT-F                             | Control         | 271 (237)         | Aerobic          | 302 (263)         |                 |                   |
| [194] | Sadeghi 2016         | Iran            | Breast      |                                   | After       | CRF                                 | Control         | 66 (66)           | CBT_PsychoSocial | 69 (69)           |                 |                   |
| [195] | Santa Mina 2013      | Canada          | Prostate    |                                   | During      | FACT-F                              | Aerobic         | 32 (32)           | Resistance       | 34 (34)           |                 |                   |
| [196] | Schjolberg 2014      | Norway          | Breast      |                                   | During      | Fatigue Questionnaire               | Control         | 81 (63)           | CBT_PsychoSocial | 79 (29)           |                 |                   |
| [197] | Schmidt 2012         | Germany         | Breast      |                                   | After       | EORTC QLQ C30                       | Control         | 19 (18)           | Resistance       | 19 (15)           |                 |                   |
| [198] | Schmidt 2014         | Germany         | Breast      |                                   | During      | FAQ                                 | Relaxation      | 49 (46)           | Resistance       | 52 (49)           |                 |                   |
| [199] | Schuler 2017         | Germany         | Mixed       | Sarcoma                           | During      | MFI                                 | Control         | 24 (20)           | Combined         | 46 (36)           |                 |                   |
| [200] | Segal 2001           | Canada          | Breast      |                                   | During      | SF-36 vitality                      | Control         | 41 (41)           | Aerobic          | 82 (82)           |                 |                   |
| [201] | Segal 2003           | Canada          | Prostate    |                                   | After       | FACT-F                              | Control         | 73 (73)           | Resistance       | 82 (82)           |                 |                   |
| [202] | Segal 2009           | Canada          | Prostate    |                                   | During      | FACT-F                              | Control         | 41 (40)           | Resistance       | 40 (34)           | Aerobic         | 40 (38)           |
| [203] | Shang 2012           | USA             | Mixed       | Prostate                          | During      | Piper Fatigue Scale                 | Control         | 58 (58)           | Combined         | 68 (68)           |                 |                   |
| [204] | Sohl 2016            | USA             | Colorectal  |                                   | During      | FACT-F                              | Control         | 7 (5)             | Yoga             | 8 (6)             |                 |                   |
| [205] | Spahn 2013           | Germany         | Breast      |                                   | After       | MFI                                 | Aerobic         | 32 (25)           | CombinedCBT      | 32 (30)           |                 |                   |
| [206] | Specia 2000          | Canada          | Mixed       | Breast                            | During      | POMS-Fatigue                        | Control         | 48 (37)           | Relaxation       | 61 (53)           |                 |                   |
| [207] | Sprod 2010           | USA             | Breast      |                                   | After       | Piper Fatigue Inventory Total Score | Control         | 17 (17)           | Combined         | 97 (97)           |                 |                   |
| [208] | Sprod 2012           | USA             | Breast      |                                   | After       | SF-36 vitality                      | Control         | 10 (10)           | TaiChi           | 11 (9)            |                 |                   |
| [209] | Sprod 2015           | USA             | Mixed       |                                   | After       | MFSI                                | Control         | 204 (44)          | Yoga             | 206 (53)          |                 |                   |
| [210] | Stan 2016            | USA             | Breast      |                                   | After       | MFSI-SF                             | Resistance      | 16 (9)            | Yoga             | 18 (14)           |                 |                   |
| [211] | Stanton 2005         | USA             | Breast      |                                   | After       | SF-36 vitality                      | Control         | 187 (136)         | CBT_PsychoSocial | 361 (282)         |                 |                   |
| [212] | Steindorf 2014       | Germany         | Breast      |                                   | During      | FAQ                                 | Relaxation      | 80 (78)           | Resistance       | 80 (77)           |                 |                   |
| [213] | Sturm 2014           | Germany         | Mixed       | Breast                            | During      | NRS Fatigue                         | Control         | 20 (20)           | Dance            | 20 (20)           |                 |                   |
| [214] | Taso 2014            | Taiwan          | Breast      |                                   | During      | BFI                                 | Control         | 30 (30)           | Yoga             | 30 (30)           |                 |                   |
| [215] | Thorsen 2005         | Norway          | Mixed       | Breast                            | After       | EORTC QLQ fatigue                   | Control         | 52 (49)           | Aerobic          | 59 (52)           |                 |                   |
| [216] | Travier 2015         | The Netherlands | Breast      |                                   | During      | MFI                                 | Control         | 102 (89)          | Combined         | 102 (93)          |                 |                   |
| [217] | Vadiraja 2009 after  | India           | Breast      |                                   | After       | EORCT-C30 Fatigue                   | Control         | 46 (31)           | Yoga             | 45 (35)           |                 |                   |
| [218] | Vadiraja 2009 during | India           | Breast      |                                   | During      | EORCT-C30 Fatigue                   | Control         | 33 (33)           | Yoga             | 42 (42)           |                 |                   |
| [219] | Vallance 2007        | Canada          | Breast      |                                   | After       | Fatigue Scale                       | Control         | 93 (85)           | Aerobic          | 284 (253)         |                 |                   |
| [220] | Van der Lee 2012     | Netherlands     | Mixed       |                                   | After       | Checklist Individual Strength       | Control         | 28 (24)           | CBT_PsychoSocial | 72 (59)           |                 |                   |
| [221] | Van Vulpen 2016      | Netherlands     | Colorectal  |                                   | During      | MFI                                 | Control         | 16 (13)           | Combined         | 17 (15)           |                 |                   |
| [222] | Vargas 2014          | USA             | Breast      |                                   | During      | FSI                                 | Control         | 120 (96)          | CBT_PsychoSocial | 120 (98)          |                 |                   |
| [223] | Wang 2011            | USA             | Breast      |                                   | During      | FACIT-F                             | Control         | 37 (32)           | Aerobic          | 35 (30)           |                 |                   |

| Nr    | study                      | Country     | Cancer-type                   | Main-cancer<br>(in mixed<br>studies) | Time period | Treatment arm 1               | Treatment arm 2 | Sample size arm<br>1 | Treatment arm 2  | Sample size<br>arm 2 | Treatment<br>arm 3 | Sample<br>Size arm<br>3 |
|-------|----------------------------|-------------|-------------------------------|--------------------------------------|-------------|-------------------------------|-----------------|----------------------|------------------|----------------------|--------------------|-------------------------|
| [224] | Wang 2014                  | China       | Breast                        |                                      | During      | Cancer fatigue scale (CFS)    | Control         | 50(42)               | Yoga             | 50(40)               |                    |                         |
| [225] | Wangnum 2013               | Thailand    | Lung                          |                                      | During      | Piper Fatigue Scale           | Control         | 30 (30)              | CombinedCBT      | 30 (30)              |                    |                         |
| [226] | Wenzel 2013                | USA         | Solid tumours                 |                                      | During      | Piper Fatigue Scale           | Control         | 65 (58)              | Aerobic          | 73 (68)              |                    |                         |
| [227] | Willems 2016               | Netherlands | Mixed                         | Breast                               | After       | CIS-F                         | Control         | 253 (221)            | CBT_PsychoSocial | 265 (188)            |                    |                         |
| [228] | Windsor 2004               | UK          | Prostate                      |                                      | During      | BFI                           | Control         | 33 (33)              | Aerobic          | 33 (32)              |                    |                         |
| [229] | Winters-Stone 2012         | USA         | Breast                        |                                      | After       | Schwartz fatigue              | Control         | 54 (31)              | Resistance       | 52 (36)              |                    |                         |
| [230] | Winters-Stone 2015         | USA         | Prostate                      |                                      | After       | Schwartz Cancer Fatigue Scale | Relaxation      | 22 (22)              | Resistance       | 29 (29)              |                    |                         |
| [231] | Winters-Stone 2016         | USA         | Prostate                      |                                      | After       | Vitality                      | Control         | 32 (32)              | Resistance       | 32 (32)              |                    |                         |
| [232] | Wiskemann 2011             | Germany     | H SCT                         |                                      | During      | MFI fatigue                   | Control         | 53 (40)              | Combined         | 52 (40)              |                    |                         |
| [233] | Xu 2012                    | China       | Breast                        |                                      | During      | R-PFS                         | Control         | 39 (37)              | Aerobic          | 39 (35)              |                    |                         |
| [234] | Yagli 2015                 | Turkey      | Breast                        |                                      | After       | NHP                           | Combined        | 10 (10)              | Yoga             | 10 (10)              |                    |                         |
| [235] | Yates 2005                 | Australia   | Breast                        |                                      | During      | FACT-F                        | Control         | 57 (49)              | CBT_PsychoSocial | 53 (50)              |                    |                         |
| [236] | Yeo 2012                   | USA         | Pancreas and<br>Periampullary |                                      | During      | FACIT-F                       | Control         | 48 (48)              | Aerobic          | 54 (54)              |                    |                         |
| [237] | Yuen 2006                  | USA         | Mixed                         |                                      | After       | Piper Fatigue Scale           | Control         | 6 (6)                | CBT_PsychoSocial | 6 (6)                |                    |                         |
| [238] | Yuen 2007                  | USA         | Breast                        |                                      | After       | Piper Fatigue Scale           | Control         | 7 (7)                | Aerobic          | 8 (8)                | Resistance         | 7<br>(7)                |
| [239] | Yun 2012                   | Korea       | Mixed                         | Breast                               | After       | BFI                           | Control         | 137 (137)            | CBT_PsychoSocial | 136 (136)            |                    |                         |
| [240] | Zhang 2016                 | China       | Lung                          |                                      | During      | MFSI-SF                       | Control         | 48 (44)              | TaiChi           | 48 (47)              |                    |                         |
| [241] | dos Santos Vigario<br>2011 | Brazil      | Thyroid                       |                                      | During      | Chalder Fatigue Scale         | Control         | 17 (17)              | Aerobic          | 19 (19)              |                    |                         |
| [242] | van Waart 2015             | Netherlands | Breast                        |                                      | During      | MFI Fatigue                   | Control         | 77 (66)              | Aerobic          | 77 (69)              | Combined           | 76<br>(71)              |
| [243] | van Weert 2010             | Netherlands | Mixed                         | Breast                               | After       | MFI                           | Control         | 62 (60)              | Combined         | 71 (66)              | CombinedCBT        | 76<br>(70)              |
| [244] | van der Meulen 2014        | Netherlands | Head and Neck                 |                                      | After       | EORTC QLQ-C30 Fatigue         | Control         | 102 (91)             | CBT_PsychoSocial | 103 (88)             |                    |                         |
| [245] | von Gruenigen 2009         | USA         | Endometrial                   |                                      | After       | FACT-F                        | Control         | 22 (22)              | CombinedCBT      | 23 (23)              |                    |                         |

## References

1. Adamsen L, Quist M, Andersen C, et al. Effect of a multimodal high intensity exercise intervention in cancer patients undergoing chemotherapy: randomised controlled trial. *BMJ (Clinical research ed.)* 2009;**339**:b3410 doi: 10.1136/bmj.b3410.
2. Ahles TA, Tope DM, Pinkson B, et al. Massage therapy for patients undergoing autologous bone marrow transplantation. *Journal of pain and symptom management* 1999;**18**(3):157-63.
3. Al-Majid S, Wilson LD, Rakovski C, Coburn JW. Effects of exercise on biobehavioral outcomes of fatigue during cancer treatment: results of a feasibility study. *Biological research for nursing* 2015;**17**(1):40-8 doi: 10.1177/1099800414523489.
4. Alibhai SM, O'Neill S, Fisher-Schlombs K, et al. A pilot phase II RCT of a home-based exercise intervention for survivors of AML. *Supportive care in cancer : official journal of the Multinational Association of Supportive Care in Cancer* 2014;**22**(4):881-9 doi: 10.1007/s00520-013-2044-8.



5. Alibhai SM, Durbano S, Breunis H, et al. A phase II exercise randomized controlled trial for patients with acute myeloid leukemia undergoing induction chemotherapy. *Leukemia research* 2015 doi: 10.1016/j.leukres.2015.08.012.
6. Andersen C, Rorth M, Ejlersen B, et al. The effects of a six-week supervised multimodal exercise intervention during chemotherapy on cancer-related fatigue. *European journal of oncology nursing : the official journal of European Oncology Nursing Society* 2013;**17**(3):331-9 doi: 10.1016/j.ejon.2012.09.003.
7. Armes J, Chalder T, Addington-Hall J, Richardson A, Hotopf M. A randomized controlled trial to evaluate the effectiveness of a brief, behaviorally oriented intervention for cancer-related fatigue. *Cancer* 2007;**110**(6):1385-95 doi: 10.1002/cncr.22923.
8. Backman M, Wengstrom Y, Johansson B, et al. A randomized pilot study with daily walking during adjuvant chemotherapy for patients with breast and colorectal cancer. *Acta oncologica (Stockholm, Sweden)* 2014;**53**(4):510-20 doi: 10.3109/0284186X.2013.873820.
9. Badger TA, Segrin C, Figueredo AJ, et al. Psychosocial interventions to improve quality of life in prostate cancer survivors and their intimate or family partners. *Quality of life research : an international journal of quality of life aspects of treatment, care and rehabilitation* 2011;**20**(6):833-44 doi: 10.1007/s11136-010-9822-2.
10. Baker BS, Harrington JE, Choi BS, Kropf P, Muller I, Hoffman CJ. A randomised controlled pilot feasibility study of the physical and psychological effects of an integrated support programme in breast cancer. *Complementary therapies in clinical practice* 2012;**18**(3):182-9 doi: 10.1016/j.ctcp.2012.03.002.
11. Banasik J, Williams H, Haberman M, Blank SE, Bendel R. Effect of Iyengar yoga practice on fatigue and diurnal salivary cortisol concentration in breast cancer survivors. *Journal of the American Academy of Nurse Practitioners* 2011;**23**(3):135-42 doi: 10.1111/j.1745-7599.2010.00573.x.
12. Bantum EO, Albright CL, White KK, et al. Surviving and thriving with cancer using a Web-based health behavior change intervention: randomized controlled trial. *Journal of medical Internet research* 2014;**16**(2):e54 doi: 10.2196/jmir.3020.
13. Bargi G, Guclu MB, Aribas Z, Aki SZ, Sucak GT. Inspiratory muscle training in allogeneic hematopoietic stem cell transplantation recipients: a randomized controlled trial. *Supportive care in cancer : official journal of the Multinational Association of Supportive Care in Cancer* 2016;**24**(2):647-59 doi: 10.1007/s00520-015-2825-3.
14. Barsevick AM, Dudley W, Beck S, Sweeney C, Whitmer K, Nail L. A randomized clinical trial of energy conservation for patients with cancer-related fatigue. *Cancer* 2004;**100**(6):1302-10 doi: 10.1002/cncr.20111.
15. Barsevick A, Beck SL, Dudley WN, et al. Efficacy of an intervention for fatigue and sleep disturbance during cancer chemotherapy. *Journal of pain and symptom management* 2010;**40**(2):200-16 doi: 10.1016/j.jpainsymman.2009.12.020.
16. Basen-Engquist K, Taylor CL, Rosenblum C, et al. Randomized pilot test of a lifestyle physical activity intervention for breast cancer survivors. *Patient education and counseling* 2006;**64**(1-3):225-34 doi: 10.1016/j.pec.2006.02.006.
17. Battaglini C, Bottaro M, Dennehy C, et al. The effects of resistance training on muscular strength and fatigue levels in breast cancer patients. *Revista brasileira de medicina do esporte* 2006;**12**(3):153-58.
18. Baumann F, Kraut L, Schüle K, Bloch W, Fauser A. A controlled randomized study examining the effects of exercise therapy on patients undergoing haematopoietic stem cell transplantation. *Bone marrow transplantation* 2010;**45**(2):355-62.
19. Baumann FT, Zopf EM, Nykamp E, et al. Physical activity for patients undergoing an allogeneic hematopoietic stem cell transplantation: benefits of a moderate exercise intervention. *European journal of haematology* 2011;**87**(2):148-56 doi: 10.1111/j.1600-0609.2011.01640.x.
20. Bennett JA, Lyons KS, Winters-Stone K, Nail LM, Scherer J. Motivational interviewing to increase physical activity in long-term cancer survivors: a randomized controlled trial. *Nursing research* 2007;**56**(1):18-27.
21. Berglund G, Bolund C, Gustafsson UL, Sjöden PO. A randomized study of a rehabilitation program for cancer patients: the 'starting again' group. *Psycho-Oncology* 1994;**3**(2):109-20.
22. Boesen EH, Ross L, Frederiksen K, et al. Psychoeducational intervention for patients with cutaneous malignant melanoma: a replication study. *Journal of clinical oncology : official journal of the American Society of Clinical Oncology* 2005;**23**(6):1270-7 doi: 10.1200/jco.2005.05.193.

23. Bourke L, Doll H, Crank H, Daley A, Rosario D, Saxton JM. Lifestyle intervention in men with advanced prostate cancer receiving androgen suppression therapy: a feasibility study. *Cancer epidemiology, biomarkers & prevention : a publication of the American Association for Cancer Research, cosponsored by the American Society of Preventive Oncology* 2011;**20**(4):647-57 doi: 10.1158/1055-9965.epi-10-1143.
24. Bourke L, Thompson G, Gibson DJ, et al. Pragmatic lifestyle intervention in patients recovering from colon cancer: a randomized controlled pilot study. *Archives of physical medicine and rehabilitation* 2011;**92**(5):749-55 doi: 10.1016/j.apmr.2010.12.020.
25. Bourke L, Gilbert S, Hooper R, et al. Lifestyle changes for improving disease-specific quality of life in sedentary men on long-term androgen-deprivation therapy for advanced prostate cancer: a randomised controlled trial. *European urology* 2014;**65**(5):865-72 doi: 10.1016/j.eururo.2013.09.040.
26. Bower JE, Garet D, Sternlieb B, et al. Yoga for persistent fatigue in breast cancer survivors: a randomized controlled trial. *Cancer* 2012;**118**(15):3766-75 doi: 10.1002/cncr.26702.
27. Bower JE, Crosswell AD, Stanton AL, et al. Mindfulness meditation for younger breast cancer survivors: a randomized controlled trial. *Cancer* 2015;**121**(8):1231-40 doi: 10.1002/cncr.29194.
28. Bridge LR, Benson P, Pietroni PC, Priest RG. Relaxation and imagery in the treatment of breast cancer. *BMJ (Clinical research ed.)* 1988;**297**(6657):1169-72.
29. Broderick JM, Guinan E, Kennedy MJ, et al. Feasibility and efficacy of a supervised exercise intervention in de-conditioned cancer survivors during the early survivorship phase: the PEACH trial. *Journal of cancer survivorship : research and practice* 2013;**7**(4):551-62 doi: 10.1007/s11764-013-0294-6.
30. Brown P, Clark MM, Atherton P, et al. Will improvement in quality of life (QOL) impact fatigue in patients receiving radiation therapy for advanced cancer? *American journal of clinical oncology* 2006;**29**(1):52-8 doi: 10.1097/01.coc.0000190459.14841.55.
31. Burnham TR, Wilcox A. Effects of exercise on physiological and psychological variables in cancer survivors. *Medicine and science in sports and exercise* 2002;**34**(12):1863-7 doi: 10.1249/01.MSS.0000040995.26076.CC.
32. Cadmus LA, Salovey P, Yu H, Chung G, Kasl S, Irwin ML. Exercise and quality of life during and after treatment for breast cancer: results of two randomized controlled trials [IMPACT]. *Psycho-Oncology* 2009;**18**(4):343-52.
33. Cadmus LA, Salovey P, Yu H, Chung G, Kasl S, Irwin ML. Exercise and quality of life during and after treatment for breast cancer: results of two randomized controlled trials [YES]. *Psycho-Oncology* 2009;**18**(4):343-52.
34. Caldwell MG. The effects of an endurance exercise regimen on cancer-related fatigue and physical performance in women with breast cancer. LOUISIANA STATE UNIV. HEALTH SCIENCES CENTER SCHOOL OF NURSING, 2009.
35. Campbell A, Mutrie N, White F, McGuire F, Kearney N. A pilot study of a supervised group exercise programme as a rehabilitation treatment for women with breast cancer receiving adjuvant treatment. *European journal of oncology nursing : the official journal of European Oncology Nursing Society* 2005;**9**(1):56-63 doi: 10.1016/j.ejon.2004.03.007.
36. Campo RA, O'Connor K, Light KC, et al. Feasibility and acceptability of a Tai Chi Chih randomized controlled trial in senior female cancer survivors. *Integrative cancer therapies* 2013;**12**(6):464-74 doi: 10.1177/1534735413485418.
37. Campo RA, Agarwal N, LaStayo PC, et al. Levels of fatigue and distress in senior prostate cancer survivors enrolled in a 12-week randomized controlled trial of Qigong. *Journal of cancer survivorship : research and practice* 2014;**8**(1):60-9 doi: 10.1007/s11764-013-0315-5.
38. Cantarero-Villanueva I, Fernández-Lao C, Díaz-Rodríguez L, Fernández-de-las-Peñas C, del Moral-Avila R, Arroyo-Morales M. A multimodal exercise program and multimedia support reduce cancer-related fatigue in breast cancer survivors: a randomised controlled clinical trial. *European Journal of Integrative Medicine* 2011;**3**(3):e189-e200.
39. Cantarero-Villanueva I, Fernandez-Lao C, Cuesta-Vargas AI, Del Moral-Avila R, Fernandez-de-Las-Penas C, Arroyo-Morales M. The effectiveness of a deep water aquatic exercise program in cancer-related fatigue in breast cancer survivors: a randomized controlled trial. *Archives of physical medicine and rehabilitation* 2013;**94**(2):221-30 doi: 10.1016/j.apmr.2012.09.008.

40. Carson JW, Carson KM, Porter LS, Keefe FJ, Seewaldt VL. Yoga of Awareness program for menopausal symptoms in breast cancer survivors: results from a randomized trial. *Supportive care in cancer : official journal of the Multinational Association of Supportive Care in Cancer* 2009;**17**(10):1301-9 doi: 10.1007/s00520-009-0587-5.
41. Cerulli C, Minganti C, De Santis C, Tranchita E, Quaranta F, Parisi A. Therapeutic horseback riding in breast cancer survivors: a pilot study. *Journal of alternative and complementary medicine (New York, N.Y.)* 2014;**20**(8):623-9 doi: 10.1089/acm.2014.0061.
42. Chakrabarty J, Vidyasagar M, Fernandes D, Joisa G, Varghese P, Mayya S. Effectiveness of pranayama on cancer-related fatigue in breast cancer patients undergoing radiation therapy: A randomized controlled trial. *International journal of yoga* 2015;**8**(1):47-53 doi: 10.4103/0973-6131.146062.
43. Chan CW, Richardson A, Richardson J. Managing symptoms in patients with advanced lung cancer during radiotherapy: results of a psychoeducational randomized controlled trial. *Journal of pain and symptom management* 2011;**41**(2):347-57 doi: 10.1016/j.jpainsymman.2010.04.024.
44. Chan A, Gan YX, Oh SK, et al. A culturally adapted survivorship programme for Asian early stage breast cancer patients in Singapore: A randomized, controlled trial. *Psycho-oncology* 2016 doi: 10.1002/pon.4357.
45. Chandwani KD, Thornton B, Perkins GH, et al. Yoga improves quality of life and benefit finding in women undergoing radiotherapy for breast cancer. *Journal of the Society for Integrative Oncology* 2010;**8**(2):43-55.
46. Chandwani KD, Perkins G, Nagendra HR, et al. Randomized, controlled trial of yoga in women with breast cancer undergoing radiotherapy. *Journal of clinical oncology : official journal of the American Society of Clinical Oncology* 2014;**32**(10):1058-65 doi: 10.1200/JCO.2012.48.2752.
47. Chang PH, Lai YH, Shun SC, et al. Effects of a walking intervention on fatigue-related experiences of hospitalized acute myelogenous leukemia patients undergoing chemotherapy: a randomized controlled trial. *Journal of pain and symptom management* 2008;**35**(5):524-34 doi: 10.1016/j.jpainsymman.2007.06.013.
48. Chen S, Huang C, Cai L. Effect of aerobic exercise on patients with laryngeal cancer related fatigue status. *Chin j Mod Nurs* 2011;**16**(17):1905-07.
49. Chen Z, Meng Z, Milbury K, et al. Qigong improves quality of life in women undergoing radiotherapy for breast cancer: results of a randomized controlled trial. *Cancer* 2013;**119**(9):1690-8 doi: 10.1002/cncr.27904.
50. Cheville AL, Kollasch J, Vandenberg J, et al. A home-based exercise program to improve function, fatigue, and sleep quality in patients with Stage IV lung and colorectal cancer: a randomized controlled trial. *Journal of pain and symptom management* 2013;**45**(5):811-21 doi: 10.1016/j.jpainsymman.2012.05.006.
51. Choi JY, Kang HS. [Effects of a home-based exercise program for patients with stomach cancer receiving oral chemotherapy after surgery]. *Journal of Korean Academy of Nursing* 2012;**42**(1):95-104 doi: 10.4040/jkan.2012.42.1.95.
52. Clark M, Isaacks-Downton G, Wells N, et al. Use of preferred music to reduce emotional distress and symptom activity during radiation therapy. *Journal of music therapy* 2006;**43**(3):247-65.
53. Classen C, Butler LD, Koopman C, et al. Supportive-expressive group therapy and distress in patients with metastatic breast cancer: a randomized clinical intervention trial. *Archives of general psychiatry* 2001;**58**(5):494-501.
54. Cohen L, Warneke C, Fouladi RT, Rodriguez MA, Chaoul-Reich A. Psychological adjustment and sleep quality in a randomized trial of the effects of a Tibetan yoga intervention in patients with lymphoma. *Cancer* 2004;**100**(10):2253-60 doi: 10.1002/cncr.20236.
55. Coleman EA, Goodwin JA, Kennedy R, et al. Effects of exercise on fatigue, sleep, and performance: a randomized trial. *Oncology nursing forum* 2012;**39**(5):468-77 doi: 10.1188/12.onf.468-477.
56. Cormie P, Newton RU, Spry N, Joseph D, Taaffe DR, Galvao DA. Safety and efficacy of resistance exercise in prostate cancer patients with bone metastases. *Prostate cancer and prostatic diseases* 2013;**16**(4):328-35 doi: 10.1038/pcan.2013.22.
57. Cormie P, Galvao DA, Spry N, et al. Can supervised exercise prevent treatment toxicity in patients with prostate cancer initiating androgen-deprivation therapy: a randomised controlled trial. *BJU international* 2015;**115**(2):256-66 doi: 10.1111/bju.12646.
58. Cornette T, Vincent F, Mandigout S, et al. Effects of home-based exercise training on VO2 in breast cancer patients under adjuvant or neoadjuvant chemotherapy (SAPA): a randomized controlled trial. *European journal of physical and rehabilitation medicine* 2016;**52**(2):223-32.

59. Courneya KS, Sellar CM, Stevinson C, et al. Randomized controlled trial of the effects of aerobic exercise on physical functioning and quality of life in lymphoma patients. *Journal of clinical oncology : official journal of the American Society of Clinical Oncology* 2009;**27**(27):4605-12 doi: 10.1200/jco.2008.20.0634.
60. Courneya KS, Friedenreich CM, Quinney HA, Fields AL, Jones LW, Fairey AS. A randomized trial of exercise and quality of life in colorectal cancer survivors. *European journal of cancer care* 2003;**12**(4):347-57.
61. Courneya KS, Mackey JR, Bell GJ, Jones LW, Field CJ, Fairey AS. Randomized controlled trial of exercise training in postmenopausal breast cancer survivors: cardiopulmonary and quality of life outcomes. *Journal of clinical oncology* 2003;**21**(9):1660-68.
62. Courneya KS, Friedenreich CM, Sela RA, Quinney HA, Rhodes RE, Handman M. The group psychotherapy and home-based physical exercise (GROUP-HOPE) trial in cancer survivors: Physical fitness and quality of life outcomes. *Psycho-oncology* 2003;**12**:357-74 doi: 10.1002/pon.658.
63. Courneya KS, Segal RJ, Mackey JR, et al. Effects of aerobic and resistance exercise in breast cancer patients receiving adjuvant chemotherapy: a multicenter randomized controlled trial. *Journal of clinical oncology : official journal of the American Society of Clinical Oncology* 2007;**25**(28):4396-404 doi: 10.1200/jco.2006.08.2024.
64. Courneya KS, Jones LW, Peddle CJ, et al. Effects of aerobic exercise training in anemic cancer patients receiving darbepoetin alfa: a randomized controlled trial. *The oncologist* 2008;**13**(9):1012-20 doi: 10.1634/theoncologist.2008-0017.
65. Cramer H, Rabsilber S, Lauche R, Kummel S, Dobos G. Yoga and meditation for menopausal symptoms in breast cancer survivors-A randomized controlled trial. *Cancer* 2015;**121**(13):2175-84 doi: 10.1002/cncr.29330.
66. Cramer H, Pokhrel B, Fester C, et al. A randomized controlled bicenter trial of yoga for patients with colorectal cancer. *Psycho-oncology* 2016;**25**(4):412-20 doi: 10.1002/pon.3927.
67. Culos-Reed SN, Carlson LE, Daroux LM, Hatley-Aldous S. A pilot study of yoga for breast cancer survivors: physical and psychological benefits. *Psycho-oncology* 2006;**15**(10):891-7 doi: 10.1002/pon.1021.
68. Culos-Reed SN, Robinson JW, Lau H, et al. Physical activity for men receiving androgen deprivation therapy for prostate cancer: benefits from a 16-week intervention. *Supportive Care in Cancer* 2010;**18**(5):591-99.
69. Daley AJ, Crank H, Saxton JM, Mutrie N, Coleman R, Roalfe A. Randomized trial of exercise therapy in women treated for breast cancer. *Journal of clinical oncology : official journal of the American Society of Clinical Oncology* 2007;**25**(13):1713-21 doi: 10.1200/jco.2006.09.5083.
70. Hacker ED, Larson J, Kujath A, Peace D, Rondelli D, Gaston L. Strength training following hematopoietic stem cell transplantation. *Cancer nursing* 2011;**34**(3):238.
71. Danhauer SC, Mihalko SL, Russell GB, et al. Restorative yoga for women with breast cancer: findings from a randomized pilot study. *Psycho-Oncology* 2009;**18**(4):360-68.
72. De Luca V, Minganti C, Borrione P, et al. Effects of concurrent aerobic and strength training on breast cancer survivors: a pilot study. *Public health* 2016;**136**:126-32 doi: 10.1016/j.puhe.2016.03.028.
73. Decker TW, Cline-Elsen J, Gallagher M. Relaxation therapy as an adjunct in radiation oncology. *Journal of clinical psychology* 1992;**48**(3):388-93.
74. Dhruva A, Miaskowski C, Abrams D, et al. Yoga breathing for cancer chemotherapy-associated symptoms and quality of life: results of a pilot randomized controlled trial. *Journal of alternative and complementary medicine (New York, N.Y.)* 2012;**18**(5):473-9 doi: 10.1089/acm.2011.0555.
75. Dibbell-Hope S. The use of dance/movement therapy in psychological adaptation to breast cancer. *Art Psychother* 2000;**27**(1):51-68 doi: Doi 10.1016/S0197-4556(99)00032-5.
76. Dimeo FC, Stieglitz RD, Novelli-Fischer U, Fetscher S, Keul J. Effects of physical activity on the fatigue and psychologic status of cancer patients during chemotherapy. *Cancer* 1999;**85**(10):2273-7.
77. Dimeo FC, Thomas F, Raabe-Menssen C, Propper F, Mathias M. Effect of aerobic exercise and relaxation training on fatigue and physical performance of cancer patients after surgery. A randomised controlled trial. *Supportive care in cancer : official journal of the Multinational Association of Supportive Care in Cancer* 2004;**12**(11):774-9 doi: 10.1007/s00520-004-0676-4.
78. Do J, Cho Y, Jeon J. Effects of a 4-week multimodal rehabilitation program on quality of life, cardiopulmonary function, and fatigue in breast cancer patients. *Journal of breast cancer* 2015;**18**(1):87-96 doi: 10.4048/jbc.2015.18.1.87.

79. Dodd MJ, Cho MH, Miaskowski C, et al. A randomized controlled trial of home-based exercise for cancer-related fatigue in women during and after chemotherapy with or without radiation therapy. *Cancer nursing* 2010;**33**(4):245-57 doi: 10.1097/NCC.0b013e3181ddc58c.
80. Dodds SE, Pace TW, Bell ML, et al. Feasibility of Cognitively-Based Compassion Training (CBCT) for breast cancer survivors: a randomized, wait list controlled pilot study. *Supportive care in cancer : official journal of the Multinational Association of Supportive Care in Cancer* 2015;**23**(12):3599-608 doi: 10.1007/s00520-015-2888-1.
81. Dolbeault S, Cayrou S, Bredart A, et al. The effectiveness of a psycho-educational group after early-stage breast cancer treatment: results of a randomized French study. *Psycho-oncology* 2009;**18**(6):647-56 doi: 10.1002/pon.1440.
82. Donnelly CM, Blaney JM, Lowe-Strong A, et al. A randomised controlled trial testing the feasibility and efficacy of a physical activity behavioural change intervention in managing fatigue with gynaecological cancer survivors. *Gynecologic oncology* 2011;**122**(3):618-24 doi: 10.1016/j.ygyno.2011.05.029.
83. Drouin JS, Armstrong H, Krause S, et al. Effects of Aerobic Exercise Training on Peak Aerobic Capacity, Fatigue, and Psychological Factors During Radiation for Breast Cancer. *Rehabilitation Oncology* 2005;**23**(1):11-17.
84. Eakin EG, Lawler SP, Winkler EA, Hayes SC. A randomized trial of a telephone-delivered exercise intervention for non-urban dwelling women newly diagnosed with breast cancer: exercise for health. *Annals of Behavioral Medicine* 2012;**43**(2):229-38.
85. Edelman S, Bell DR, Kidman AD. A group cognitive behaviour therapy programme with metastatic breast cancer patients. *Psycho-Oncology* 1999;**8**(4):295-305.
86. Ergun M, Eyigor S, Karaca B, Kisim A, Uslu R. Effects of exercise on angiogenesis and apoptosis-related molecules, quality of life, fatigue and depression in breast cancer patients. *European journal of cancer care* 2013;**22**(5):626-37 doi: 10.1111/ecc.12068.
87. Eyigor S, Karapolat H, Yesil H, Uslu R, Durmaz B. Effects of pilates exercises on functional capacity, flexibility, fatigue, depression and quality of life in female breast cancer patients: a randomized controlled study. *European journal of physical and rehabilitation medicine* 2010;**46**(4):481-7.
88. Ferguson RJ, Sigmon ST, Pritchard AJ, et al. A randomized trial of videoconference-delivered cognitive behavioral therapy for survivors of breast cancer with self-reported cognitive dysfunction. *Cancer* 2016;**122**(11):1782-91 doi: 10.1002/cncr.29891.
89. Fillion L, Gagnon P, Leblond F, et al. A brief intervention for fatigue management in breast cancer survivors. *Cancer nursing* 2008;**31**(2):145-59 doi: 10.1097/01.ncc.0000305698.97625.95.
90. Foster C, Grimmett C, May CM, et al. A web-based intervention (RESTORE) to support self-management of cancer-related fatigue following primary cancer treatment: a multi-centre proof of concept randomised controlled trial. *Supportive Care in Cancer* 2016;**24**(6):2445-53.
91. Freeman LW, White R, Ratcliff CG, et al. A randomized trial comparing live and telemedicine deliveries of an imagery-based behavioral intervention for breast cancer survivors: reducing symptoms and barriers to care. *Psycho-oncology* 2015;**24**(8):910-8 doi: 10.1002/pon.3656.
92. Fukui S, Kugaya A, Okamura H, et al. A psychosocial group intervention for Japanese women with primary breast carcinoma. *Cancer* 2000;**89**(5):1026-36.
93. Furzer BJ, Ackland TR, Wallman KE, et al. A randomised controlled trial comparing the effects of a 12-week supervised exercise versus usual care on outcomes in haematological cancer patients. *Supportive care in cancer : official journal of the Multinational Association of Supportive Care in Cancer* 2016;**24**(4):1697-707 doi: 10.1007/s00520-015-2955-7.
94. Galiano-Castillo N, Cantarero-Villanueva I, Fernandez-Lao C, et al. Telehealth system: A randomized controlled trial evaluating the impact of an internet-based exercise intervention on quality of life, pain, muscle strength, and fatigue in breast cancer survivors. *Cancer* 2016;**122**(20):3166-74 doi: 10.1002/cncr.30172.
95. Galvao DA, Taaffe DR, Spry N, Joseph D, Newton RU. Combined resistance and aerobic exercise program reverses muscle loss in men undergoing androgen suppression therapy for prostate cancer without bone metastases: a randomized controlled trial. *Journal of clinical oncology : official journal of the American Society of Clinical Oncology* 2010;**28**(2):340-7 doi: 10.1200/jco.2009.23.2488.
96. Galvao DA, Spry N, Denham J, et al. A multicentre year-long randomised controlled trial of exercise training targeting physical functioning in men with prostate cancer previously treated with androgen suppression and radiation from TROG 03.04 RADAR. *European urology* 2014;**65**(5):856-64 doi: 10.1016/j.eururo.2013.09.041.
97. Garssen B, Boomsma MF, Meezenbroek Ede J, et al. Stress management training for breast cancer surgery patients. *Psycho-oncology* 2013;**22**(3):572-80 doi: 10.1002/pon.3034.

98. Gielissen MF, Verhagen S, Witjes F, Bleijenberg G. Effects of cognitive behavior therapy in severely fatigued disease-free cancer patients compared with patients waiting for cognitive behavior therapy: a randomized controlled trial. *Journal of clinical oncology : official journal of the American Society of Clinical Oncology* 2006;**24**(30):4882-7 doi: 10.1200/jco.2006.06.8270.
99. Goedendorp MM, Peters ME, Gielissen MF, et al. Is increasing physical activity necessary to diminish fatigue during cancer treatment? Comparing cognitive behavior therapy and a brief nursing intervention with usual care in a multicenter randomized controlled trial. *The oncologist* 2010;**15**(10):1122-32 doi: 10.1634/theoncologist.2010-0092.
100. Gokal K, Wallis D, Ahmed S, Boiangiu I, Kancherla K, Munir F. Effects of a self-managed home-based walking intervention on psychosocial health outcomes for breast cancer patients receiving chemotherapy: a randomised controlled trial. *Supportive care in cancer : official journal of the Multinational Association of Supportive Care in Cancer* 2016;**24**(3):1139-66 doi: 10.1007/s00520-015-2884-5.
101. Goodwin PJ, Leszcz M, Ennis M, et al. The effect of group psychosocial support on survival in metastatic breast cancer. *The New England journal of medicine* 2001;**345**(24):1719-26 doi: 10.1056/NEJMoa011871.
102. Hacker ED, Collins E, Park C, Peters T, Patel P, Rondelli D. Strength Training to Enhance Early Recovery after Hematopoietic Stem Cell Transplantation. *Biology of blood and marrow transplantation : journal of the American Society for Blood and Marrow Transplantation* 2016 doi: 10.1016/j.bbmt.2016.12.637.
103. Hagstrom AD, Marshall PW, Lonsdale C, Cheema BS, Fiatarone Singh MA, Green S. Resistance training improves fatigue and quality of life in previously sedentary breast cancer survivors: a randomised controlled trial. *European journal of cancer care* 2016;**25**(5):784-94 doi: 10.1111/ecc.12422.
104. Haines TP, Sinnamon P, Wetzig NG, et al. Multimodal exercise improves quality of life of women being treated for breast cancer, but at what cost? Randomized trial with economic evaluation. *Breast cancer research and treatment* 2010;**124**(1):163-75.
105. Hawkes AL, Chambers SK, Pakenham KI, et al. Effects of a telephone-delivered multiple health behavior change intervention (CanChange) on health and behavioral outcomes in survivors of colorectal cancer: a randomized controlled trial. *Journal of clinical oncology : official journal of the American Society of Clinical Oncology* 2013;**31**(18):2313-21 doi: 10.1200/jco.2012.45.5873.
106. Hayama Y, Inoue T. The effects of deep breathing on 'tension-anxiety' and fatigue in cancer patients undergoing adjuvant chemotherapy. *Complementary therapies in clinical practice* 2012;**18**(2):94-8 doi: 10.1016/j.ctcp.2011.10.001.
107. Hayes SC, Rye S, Disipio T, et al. Exercise for health: a randomized, controlled trial evaluating the impact of a pragmatic, translational exercise intervention on the quality of life, function and treatment-related side effects following breast cancer. *Breast cancer research and treatment* 2013;**137**(1):175-86 doi: 10.1007/s10549-012-2331-y.
108. Heim ME, v d Malsburg ML, Niklas A. Randomized controlled trial of a structured training program in breast cancer patients with tumor-related chronic fatigue. *Onkologie* 2007;**30**(8-9):429-34 doi: 10.1159/0000104097.
109. Heiney SP, Reavis K, Tavakoli AS, Adams SA, Hayne PD, Weinrich SP. The Impact of STORY on Depression and Fatigue in African-American Women with Breast Cancer. *Journal of National Black Nurses' Association : JNBNA* 2015;**26**(1):1-7.
110. Kuehl R, Schmidt ME, Dreger P, Steindorf K, Bohus M, Wiskemann J. Determinants of exercise adherence and contamination in a randomized controlled trial in cancer patients during and after allogeneic HCT. *Supportive care in cancer : official journal of the Multinational Association of Supportive Care in Cancer* 2016;**24**(10):4327-37 doi: 10.1007/s00520-016-3271-6.
111. Hoffman CJ, Ersser SJ, Hopkinson JB, Nicholls PG, Harrington JE, Thomas PW. Effectiveness of mindfulness-based stress reduction in mood, breast- and endocrine-related quality of life, and well-being in stage 0 to III breast cancer: a randomized, controlled trial. *Journal of clinical oncology : official journal of the American Society of Clinical Oncology* 2012;**30**(12):1335-42 doi: 10.1200/jco.2010.34.0331.
112. Hoffman AJ, Brintnall RA, Given BA, von Eye A, Jones LW, Brown JK. Using Perceived Self-efficacy to Improve Fatigue and Fatigability In Postsurgical Lung Cancer Patients: A Pilot Randomized Controlled Trial. *Cancer nursing* 2017;**40**(1):1-12 doi: 10.1097/NCC.0000000000000378.

113. Hojan K, Kwiatkowska-Borowczyk E, Leporowska E, et al. Physical exercise for functional capacity, blood immune function, fatigue, and quality of life in high-risk prostate cancer patients during radiotherapy: a prospective, randomized clinical study. *European journal of physical and rehabilitation medicine* 2016;**52**(4):489-501.
114. Hornsby WE, Douglas PS, West MJ, et al. Safety and efficacy of aerobic training in operable breast cancer patients receiving neoadjuvant chemotherapy: a phase II randomized trial. *Acta oncologica* 2014;**53**(1):65-74.
115. Hu J, Ren T, Tan B, Gao Q, Wu H. Effects of aerobic exercises on cancer-related fatigue for patients with nasopharyngeal carcinoma undergoing radiotherapy. *Modern Oncology* 2012;**20**(6):1155-57.
116. Hubbard G, Munro J, O'Carroll R, et al. The use of cardiac rehabilitation services to aid the recovery of patients with bowel cancer: a pilot randomised controlled trial with embedded feasibility study. *Health Services and Delivery Research* 2016.
117. Husebo AM, Dyrstad SM, Mjaaland I, Soreide JA, Bru E. Effects of scheduled exercise on cancer-related fatigue in women with early breast cancer. *TheScientificWorldJournal* 2014;**2014**:271828 doi: 10.1155/2014/271828.
118. Hwang JH, Chang HJ, Shim YH, et al. Effects of supervised exercise therapy in patients receiving radiotherapy for breast cancer. *Yonsei medical journal* 2008;**49**(3):443-50 doi: 10.3349/ymj.2008.49.3.443.
119. Hwang CL, Yu CJ, Shih JY, Yang PC, Wu YT. Effects of exercise training on exercise capacity in patients with non-small cell lung cancer receiving targeted therapy. *Supportive care in cancer : official journal of the Multinational Association of Supportive Care in Cancer* 2012;**20**(12):3169-77 doi: 10.1007/s00520-012-1452-5.
120. Irwin ML, Cartmel B, Harrigan M, et al. Effect of the LIVESTRONG at the YMCA exercise program on physical activity, fitness, quality of life, and fatigue in cancer survivors. *Cancer* 2016 doi: 10.1002/cncr.30456.
121. Jacobsen PB, Meade CD, Stein KD, Chirikos TN, Small BJ, Ruckdeschel JC. Efficacy and costs of two forms of stress management training for cancer patients undergoing chemotherapy. *Journal of clinical oncology* 2002;**20**(12):2851-62.
122. Jarden M, Baadsgaard MT, Hovgaard DJ, Boesen E, Adamsen L. A randomized trial on the effect of a multimodal intervention on physical capacity, functional performance and quality of life in adult patients undergoing allogeneic SCT. *Bone marrow transplantation* 2009;**43**(9):725-37 doi: 10.1038/bmt.2009.27.
123. Jensen W, Baumann FT, Stein A, et al. Exercise training in patients with advanced gastrointestinal cancer undergoing palliative chemotherapy: a pilot study. *Supportive care in cancer : official journal of the Multinational Association of Supportive Care in Cancer* 2014;**22**(7):1797-806 doi: 10.1007/s00520-014-2139-x.
124. Johns SA, Brown LF, Beck-Coon K, Monahan PO, Tong Y, Kroenke K. Randomized controlled pilot study of mindfulness-based stress reduction for persistently fatigued cancer survivors. *Psycho-oncology* 2015;**24**(8):885-93 doi: 10.1002/pon.3648.
125. Johnston MF, Hays RD, Subramanian SK, et al. Patient education integrated with acupuncture for relief of cancer-related fatigue randomized controlled feasibility study. *BMC complementary and alternative medicine* 2011;**11**:49 doi: 10.1186/1472-6882-11-49.
126. Jones LW, Hornsby WE, Freedland SJ, et al. Effects of nonlinear aerobic training on erectile dysfunction and cardiovascular function following radical prostatectomy for clinically localized prostate cancer. *European urology* 2014;**65**(5):852-55.
127. Korstjens I, May AM, van Weert E, et al. Quality of life after self-management cancer rehabilitation: a randomized controlled trial comparing physical and cognitive-behavioral training versus physical training. *Psychosomatic medicine* 2008;**70**(4):422-29.
128. Kampshoff CS, Chinapaw MJ, Brug J, et al. Randomized controlled trial of the effects of high intensity and low-to-moderate intensity exercise on physical fitness and fatigue in cancer survivors: results of the Resistance and Endurance exercise After ChemoTherapy (REACT) study. *BMC medicine* 2015;**13**:275 doi: 10.1186/s12916-015-0513-2.
129. Kiecolt-Glaser JK, Bennett JM, Andridge R, et al. Yoga's impact on inflammation, mood, and fatigue in breast cancer survivors: a randomized controlled trial. *Journal of clinical oncology : official journal of the American Society of Clinical Oncology* 2014;**32**(10):1040-9 doi: 10.1200/JCO.2013.51.8860.
130. Kim SD, Kim HS. Effects of a relaxation breathing exercise on fatigue in haemopoietic stem cell transplantation patients. *Journal of clinical nursing* 2005;**14**(1):51-5 doi: 10.1111/j.1365-2702.2004.00938.x.

131. Kim DS, Sim YJ, Jeong HJ, Kim GC. Effect of active resistive exercise on breast cancer-related lymphedema: a randomized controlled trial. *Archives of physical medicine and rehabilitation* 2010;**91**(12):1844-8 doi: 10.1016/j.apmr.2010.09.008.
132. Kim SH, Shin MS, Lee HS, et al. Randomized pilot test of a simultaneous stage-matched exercise and diet intervention for breast cancer survivors. *Oncology nursing forum* 2011;**38**(2):E97-106 doi: 10.1188/11.onf.e97-e106.
133. Kim YH, Kim HJ, Ahn SD, Seo YJ, Kim SH. Effects of meditation on anxiety, depression, fatigue, and quality of life of women undergoing radiation therapy for breast cancer. *Complementary therapies in medicine* 2013;**21**(4):379-87 doi: 10.1016/j.ctim.2013.06.005.
134. Knols R, De Bruin E, Uebelhart D, et al. Effects of an outpatient physical exercise program on hematopoietic stem-cell transplantation recipients: a randomized clinical trial. *Bone marrow transplantation* 2011;**46**(9):1245-55.
135. Kovacs Z, Rigo A, Kokonyei G, et al. [Complex psycho-social intervention program complementing conventional antitumor therapy -- promising results]. *Magyar onkologia* 2012;**56**(4):247-57 doi: MagyOnkol.2012.56.4.247.
136. Kwiatkowski F, Mouret-Reynier MA, Duclos M, et al. Long term improved quality of life by a 2-week group physical and educational intervention shortly after breast cancer chemotherapy completion. Results of the 'Programme of Accompanying women after breast Cancer treatment completion in Thermal resorts' (PACThe) randomised clinical trial of 251 patients. *European journal of cancer (Oxford, England : 1990)* 2013;**49**(7):1530-8 doi: 10.1016/j.ejca.2012.12.021.
137. Larkey LK, Roe DJ, Weihs KL, et al. Randomized controlled trial of Qigong/Tai Chi Easy on cancer-related fatigue in breast cancer survivors. *Annals of behavioral medicine : a publication of the Society of Behavioral Medicine* 2015;**49**(2):165-76 doi: 10.1007/s12160-014-9645-4.
138. Lengacher CA, Reich RR, Post-White J, et al. Mindfulness based stress reduction in post-treatment breast cancer patients: an examination of symptoms and symptom clusters. *Journal of behavioral medicine* 2012;**35**(1):86-94 doi: 10.1007/s10865-011-9346-4.
139. Lengacher CA, Reich RR, Paterson CL, et al. Examination of Broad Symptom Improvement Resulting From Mindfulness-Based Stress Reduction in Breast Cancer Survivors: A Randomized Controlled Trial. *Journal of clinical oncology : official journal of the American Society of Clinical Oncology* 2016;**34**(24):2827-34 doi: 10.1200/JCO.2015.65.7874.
140. Ligibel JA, Meyerhardt J, Pierce JP, et al. Impact of a telephone-based physical activity intervention upon exercise behaviors and fitness in cancer survivors enrolled in a cooperative group setting. *Breast cancer research and treatment* 2012;**132**(1):205-13 doi: 10.1007/s10549-011-1882-7.
141. Ligibel JA, Giobbie-Hurder A, Shockro L, et al. Randomized trial of a physical activity intervention in women with metastatic breast cancer. *Cancer* 2016;**122**(8):1169-77.
142. Litterini AJ, Fieler VK, Cavanaugh JT, Lee JQ. Differential effects of cardiovascular and resistance exercise on functional mobility in individuals with advanced cancer: a randomized trial. *Archives of physical medicine and rehabilitation* 2013;**94**(12):2329-35 doi: 10.1016/j.apmr.2013.06.008.
143. Littman AJ, Bertram LC, Ceballos R, et al. Randomized controlled pilot trial of yoga in overweight and obese breast cancer survivors: effects on quality of life and anthropometric measures. *Supportive care in cancer : official journal of the Multinational Association of Supportive Care in Cancer* 2012;**20**(2):267-77 doi: 10.1007/s00520-010-1066-8.
144. Loh SY, Lee SY, Murray L. The Kuala Lumpur Qigong trial for women in the cancer survivorship phase-efficacy of a three-arm RCT to improve QOL. *Asian Pacific journal of cancer prevention : APJCP* 2014;**15**(19):8127-34.
145. Loudon A, Barnett T, Piller N, Immink MA, Williams AD. Yoga management of breast cancer-related lymphoedema: a randomised controlled pilot-trial. *BMC complementary and alternative medicine* 2014;**14**:214 doi: 10.1186/1472-6882-14-214.
146. Lutgendorf SK, Mullen-Houser E, Russell D, et al. Preservation of immune function in cervical cancer patients during chemoradiation using a novel integrative approach. *Brain, behavior, and immunity* 2010;**24**(8):1231-40 doi: 10.1016/j.bbi.2010.06.014.
147. Lotzke D, Wiedemann F, Rodrigues Recchia D, et al. Iyengar-Yoga Compared to Exercise as a Therapeutic Intervention during (Neo)adjuvant Therapy in Women with Stage I-III Breast Cancer: Health-Related Quality of Life, Mindfulness, Spirituality, Life Satisfaction, and Cancer-Related Fatigue. *Evidence-based complementary and alternative medicine : eCAM* 2016;**2016**:5931816 doi: 10.1155/2016/5931816.



148. May AM, Korstjens I, van Weert E, et al. Long-term effects on cancer survivors' quality of life of physical training versus physical training combined with cognitive-behavioral therapy: results from a randomized trial. *Supportive Care in Cancer* 2009;**17**(6):653-63.
149. McKenzie DC, Kalda AL. Effect of upper extremity exercise on secondary lymphedema in breast cancer patients: a pilot study. *Journal of clinical oncology : official journal of the American Society of Clinical Oncology* 2003;**21**(3):463-6 doi: 10.1200/jco.2003.04.069.
150. McNeely ML, Parliament MB, Seikaly H, et al. Effect of exercise on upper extremity pain and dysfunction in head and neck cancer survivors: a randomized controlled trial. *Cancer* 2008;**113**(1):214-22 doi: 10.1002/cncr.23536.
151. McQuade JL, Prinsloo S, Chang DZ, et al. Qigong/tai chi for sleep and fatigue in prostate cancer patients undergoing radiotherapy: a randomized controlled trial. *Psycho-oncology* 2016 doi: 10.1002/pon.4256.
152. Mehnert A, Veers S, Howaldt D, Braumann K-M, Koch U, Schulz K-H. Effects of a physical exercise rehabilitation group program on anxiety, depression, body image, and health-related quality of life among breast cancer patients. *Oncology Research and Treatment* 2011;**34**(5):248-53.
153. Midtgaard J, Christensen JF, Tolver A, et al. Efficacy of multimodal exercise-based rehabilitation on physical activity, cardiorespiratory fitness, and patient-reported outcomes in cancer survivors: a randomized, controlled trial. *Annals of oncology* 2013;**24**(9):2267-73.
154. Miladinia M, Baraz S, Shariati A, Malehi AS. Effects of Slow-Stroke Back Massage on Symptom Cluster in Adult Patients With Acute Leukemia: *Supportive Care in Cancer Nursing*. *Cancer nursing* 2017;**40**(1):31-38 doi: 10.1097/NCC.0000000000000353.
155. Milne HM, Wallman KE, Gordon S, Courneya KS. Effects of a combined aerobic and resistance exercise program in breast cancer survivors: a randomized controlled trial. *Breast cancer research and treatment* 2008;**108**(2):279-88 doi: 10.1007/s10549-007-9602-z.
156. Moadel AB, Shah C, Wylie-Rosett J, et al. Randomized controlled trial of yoga among a multiethnic sample of breast cancer patients: effects on quality of life. *Journal of clinical oncology : official journal of the American Society of Clinical Oncology* 2007;**25**(28):4387-95 doi: 10.1200/jco.2006.06.6027.
157. Mock V, Frangakis C, Davidson NE, et al. Exercise manages fatigue during breast cancer treatment: a randomized controlled trial. *Psycho-oncology* 2005;**14**(6):464-77 doi: 10.1002/pon.863.
158. Molassiotis A, Charalambous A, Taylor P, Stamataki Z, Summers Y. The effect of resistance inspiratory muscle training in the management of breathlessness in patients with thoracic malignancies: a feasibility randomised trial. *Supportive care in cancer : official journal of the Multinational Association of Supportive Care in Cancer* 2015;**23**(6):1637-45 doi: 10.1007/s00520-014-2511-x.
159. Monga U, Garber SL, Thornby J, et al. Exercise prevents fatigue and improves quality of life in prostate cancer patients undergoing radiotherapy. *Archives of physical medicine and rehabilitation* 2007;**88**(11):1416-22 doi: 10.1016/j.apmr.2007.08.110.
160. Montgomery GH, David D, Kangas M, et al. Randomized controlled trial of a cognitive-behavioral therapy plus hypnosis intervention to control fatigue in patients undergoing radiotherapy for breast cancer. *Journal of clinical oncology : official journal of the American Society of Clinical Oncology* 2014;**32**(6):557-63 doi: 10.1200/JCO.2013.49.3437.
161. Moros MT, Ruidiaz M, Caballero A, Serrano E, Martinez V, Tres A. Effects of an exercise training program on the quality of life of women with breast cancer on chemotherapy. *Revista medica de Chile* 2010;**138**(6):715-22.
162. Mustian KM, Peppone L, Darling TV, Palesh O, Heckler CE, Morrow GR. A 4-week home-based aerobic and resistance exercise program during radiation therapy: a pilot randomized clinical trial. *The journal of supportive oncology* 2009;**7**(5):158-67.
163. Mustian KM, Roscoe JA, Palesh OG, et al. Polarity Therapy for cancer-related fatigue in patients with breast cancer receiving radiation therapy: a randomized controlled pilot study. *Integrative cancer therapies* 2011;**10**(1):27-37 doi: 10.1177/1534735410397044.
164. Mutrie N, Campbell AM, Whyte F, et al. Benefits of supervised group exercise programme for women being treated for early stage breast cancer: pragmatic randomised controlled trial. *BMJ (Clinical research ed.)* 2007;**334**(7592):517.
165. Naraphong W, Lane A, Schafer J, Whitmer K, Wilson BR. Exercise intervention for fatigue-related symptoms in Thai women with breast cancer: A pilot study. *Nursing & health sciences* 2014 doi: 10.1111/nhs.12124.

166. O'Brien L, Loughnan A, Purcell A, Haines T. Education for cancer-related fatigue: could talking about it make people more likely to report it? Supportive care in cancer : official journal of the Multinational Association of Supportive Care in Cancer 2014;**22**(1):209-15 doi: 10.1007/s00520-013-1964-7.
167. Oh B, Butow P, Mullan B, Clarke S. Medical Qigong for cancer patients: pilot study of impact on quality of life, side effects of treatment and inflammation. The American journal of Chinese medicine 2008;**36**(03):459-72.
168. Oh B, Butow P, Mullan B, et al. Impact of medical Qigong on quality of life, fatigue, mood and inflammation in cancer patients: a randomized controlled trial. Annals of oncology : official journal of the European Society for Medical Oncology 2010;**21**(3):608-14 doi: 10.1093/annonc/mdp479.
169. Oldervoll LM, Loge JH, Lydersen S, et al. Physical exercise for cancer patients with advanced disease: a randomized controlled trial. The oncologist 2011;**16**(11):1649-57 doi: 10.1634/theoncologist.2011-0133.
170. Pinto BM, Clark MM, Maruyama NC, Feder SI. Psychological and fitness changes associated with exercise participation among women with breast cancer. Psycho-oncology 2003;**12**(2):118-26.
171. Pinto BM, Frierson GM, Rabin C, Trunzo JJ, Marcus BH. Home-based physical activity intervention for breast cancer patients. Journal of clinical oncology : official journal of the American Society of Clinical Oncology 2005;**23**(15):3577-87 doi: 10.1200/jco.2005.03.080.
172. Pinto BM, Papandonatos GD, Goldstein MG. A randomized trial to promote physical activity among breast cancer patients. Health psychology : official journal of the Division of Health Psychology, American Psychological Association 2013;**32**(6):616-26 doi: 10.1037/a0029886.
173. Pinto BM, Papandonatos GD, Goldstein MG, Marcus BH, Farrell N. Home-based physical activity intervention for colorectal cancer survivors. Psycho-oncology 2013;**22**(1):54-64 doi: 10.1002/pon.2047.
174. Pinto B, Stein K, Dunsiger S. Peer mentorship to promote physical activity among cancer survivors: effects on quality of life. Psycho-oncology 2015 doi: 10.1002/pon.3884.
175. Poorkiani M, Abbaszadeh A, Hazrati M, Jafari P, Sadeghi M, Mohammadianpanah M. The effect of rehabilitation on quality of life in female breast cancer survivors in Iran. Indian Journal of Medical and Paediatric Oncology 2010;**31**(4):105.
176. Post-White J, Kinney ME, Savik K, Gau JB, Wilcox C, Lerner I. Therapeutic massage and healing touch improve symptoms in cancer. Integrative cancer therapies 2003;**2**(4):332-44 doi: 10.1177/1534735403259064.
177. Prinsen H, Bleijenberg G, Heijmen L, et al. The role of physical activity and physical fitness in postcancer fatigue: a randomized controlled trial. Supportive care in cancer : official journal of the Multinational Association of Supportive Care in Cancer 2013;**21**(8):2279-88 doi: 10.1007/s00520-013-1784-9.
178. Pruthi S, Stan DL, Jenkins SM, et al. A Randomized Controlled Pilot Study Assessing Feasibility and Impact of Yoga Practice on Quality of Life, Mood, and Perceived Stress in Women With Newly Diagnosed Breast Cancer. Global advances in health and medicine : improving healthcare outcomes worldwide 2012;**1**(5):30-5 doi: 10.7453/gahmj.2012.1.5.010.
179. Purcell A, Fleming J, Burmeister B, Bennett S, Haines T. Is education an effective management strategy for reducing cancer-related fatigue? Supportive care in cancer : official journal of the Multinational Association of Supportive Care in Cancer 2011;**19**(9):1429-39 doi: 10.1007/s00520-010-0970-2.
180. Rabin C, Dunsiger S, Ness KK, Marcus BH. Internet-Based Physical Activity Intervention Targeting Young Adult Cancer Survivors. Journal of adolescent and young adult oncology 2011;**1**(4):188-94 doi: 10.1089/jayao.2011.0040.
181. Rahmani S, Talepasand S. The effect of group mindfulness - based stress reduction program and conscious yoga on the fatigue severity and global and specific life quality in women with breast cancer. Medical journal of the Islamic Republic of Iran 2015;**29**:175.
182. Rauchfuß M, Listing M, Klapp B, Reißhauer A. Massagetherapie reduziert Schmerzen, Erschöpfung und Stress bei Mammakarzinompatientinnen. Geburtshilfe und Frauenheilkunde 2010;**70**(10):817-24.
183. Ream E, Richardson A, Alexander-Dann C. Supportive intervention for fatigue in patients undergoing chemotherapy: a randomized controlled trial. Journal of pain and symptom management 2006;**31**(2):148-61 doi: 10.1016/j.jpainsymman.2005.07.003.

184. Ream E, Gargaro G, Barsevick A, Richardson A. Management of cancer-related fatigue during chemotherapy through telephone motivational interviewing: modeling and randomized exploratory trial. *Patient education and counseling* 2015;**98**(2):199-206 doi: 10.1016/j.pec.2014.10.012.
185. Reich RR, Lengacher CA, Kip KE, et al. Baseline immune biomarkers as predictors of MBSR (BC) treatment success in off-treatment breast cancer patients. *Biological research for nursing* 2014;**16**(4):429-37.
186. Reif K, de Vries U, Petermann F, Gorres S. A patient education program is effective in reducing cancer-related fatigue: a multi-centre randomised two-group waiting-list controlled intervention trial. *European journal of oncology nursing : the official journal of European Oncology Nursing Society* 2013;**17**(2):204-13 doi: 10.1016/j.ejon.2012.07.002.
187. Reis D, Walsh ME, Young-McCaughan S, Jones T. Effects of Nia exercise in women receiving radiation therapy for breast cancer. *Oncology nursing forum* 2013;**40**(5):E374-81 doi: 10.1188/13.onf.e374-e381.
188. Rief H, Akbar M, Keller M, et al. Quality of life and fatigue of patients with spinal bone metastases under combined treatment with resistance training and radiation therapy- a randomized pilot trial. *Radiation oncology (London, England)* 2014;**9**:151 doi: 10.1186/1748-717X-9-151.
189. Rogers LQ, Hopkins-Price P, Vicari S, et al. Physical activity and health outcomes three months after completing a physical activity behavior change intervention: persistent and delayed effects. *Cancer epidemiology, biomarkers & prevention : a publication of the American Association for Cancer Research, cosponsored by the American Society of Preventive Oncology* 2009;**18**(5):1410-8 doi: 10.1158/1055-9965.epi-08-1045.
190. Rogers LQ, Anton PM, Fogleman A, et al. Pilot, randomized trial of resistance exercise during radiation therapy for head and neck cancer. *Head & neck* 2013;**35**(8):1178-88 doi: 10.1002/hed.23118.
191. Rogers LQ, Vicari S, Trammell R, et al. Biobehavioral factors mediate exercise effects on fatigue in breast cancer survivors. *Medicine and science in sports and exercise* 2014;**46**(6):1077-88 doi: 10.1249/MSS.0000000000000210.
192. Rogers LQ, Courneya KS, Anton PM, et al. Effects of a multicomponent physical activity behavior change intervention on fatigue, anxiety, and depressive symptomatology in breast cancer survivors: randomized trial. *Psycho-oncology* 2016 doi: 10.1002/pon.4254.
193. Saarto T, Penttinen HM, Sievanen H, et al. Effectiveness of a 12-month exercise program on physical performance and quality of life of breast cancer survivors. *Anticancer research* 2012;**32**(9):3875-84.
194. Sadeghi E, Gozali N, Moghaddam Tabrizi F. Effects of Energy Conservation Strategies on Cancer Related Fatigue and Health Promotion Lifestyle in Breast CancerSurvivors: a Randomized Control Trial. *Asian Pacific journal of cancer prevention : APJCP* 2016;**17**(10):4783-90.
195. Santa Mina D, Alibhai SM, Matthew AG, et al. A randomized trial of aerobic versus resistance exercise in prostate cancer survivors. *Journal of aging and physical activity* 2013;**21**(4):455-78.
196. Schjolberg TK, Dodd M, Henriksen N, Asplund K, Cvancarova Smastuen M, Rustoen T. Effects of an educational intervention for managing fatigue in women with early stage breast cancer. *European journal of oncology nursing : the official journal of European Oncology Nursing Society* 2014;**18**(3):286-94 doi: 10.1016/j.ejon.2014.01.008.
197. Schmidt T, Weisser B, Jonat W, Baumann FT, Mundhenke C. Gentle strength training in rehabilitation of breast cancer patients compared to conventional therapy. *Anticancer research* 2012;**32**(8):3229-33.
198. Schmidt ME, Wiskemann J, Armbrust P, Schneeweiss A, Ulrich CM, Steindorf K. Effects of resistance exercise on fatigue and quality of life in breast cancer patients undergoing adjuvant chemotherapy: A randomized controlled trial. *International journal of cancer* 2015;**137**(2):471-80 doi: 10.1002/ijc.29383.
199. Schuler MK, Hentschel L, Kisel W, et al. Impact of Different Exercise Programs on Severe Fatigue in Patients Undergoing Anticancer Treatment-A Randomized Controlled Trial. *Journal of pain and symptom management* 2017;**53**(1):57-66 doi: 10.1016/j.jpainsymman.2016.08.014.
200. Segal R, Evans W, Johnson D, et al. Structured exercise improves physical functioning in women with stages I and II breast cancer: results of a randomized controlled trial. *Journal of Clinical Oncology* 2001;**19**(3):657-65.

201. Segal RJ, Reid RD, Courneya KS, et al. Resistance exercise in men receiving androgen deprivation therapy for prostate cancer. *Journal of clinical oncology : official journal of the American Society of Clinical Oncology* 2003;**21**(9):1653-9 doi: 10.1200/jco.2003.09.534.
202. Segal RJ, Reid RD, Courneya KS, et al. Randomized controlled trial of resistance or aerobic exercise in men receiving radiation therapy for prostate cancer. *Journal of clinical oncology : official journal of the American Society of Clinical Oncology* 2009;**27**(3):344-51 doi: 10.1200/jco.2007.15.4963.
203. Shang J, Wenzel J, Krumm S, Griffith K, Stewart K. Who will drop out and who will drop in: exercise adherence in a randomized clinical trial among patients receiving active cancer treatment. *Cancer nursing* 2012;**35**(4):312-22 doi: 10.1097/NCC.0b013e318236a3b3.
204. Sohl SJ, Danhauer SC, Birdee GS, et al. A brief yoga intervention implemented during chemotherapy: A randomized controlled pilot study. *Complementary therapies in medicine* 2016;**25**:139-42 doi: 10.1016/j.ctim.2016.02.003.
205. Spahn G, Choi KE, Kennemann C, et al. Can a multimodal mind-body program enhance the treatment effects of physical activity in breast cancer survivors with chronic tumor-associated fatigue? A randomized controlled trial. *Integrative cancer therapies* 2013;**12**(4):291-300 doi: 10.1177/1534735413492727.
206. Speca M, Carlson LE, Goodey E, Angen M. A randomized, wait-list controlled clinical trial: the effect of a mindfulness meditation-based stress reduction program on mood and symptoms of stress in cancer outpatients. *Psychosomatic medicine* 2000;**62**(5):613-22.
207. Sprod LK, Hsieh CC, Hayward R, Schneider CM. Three versus six months of exercise training in breast cancer survivors. *Breast cancer research and treatment* 2010;**121**(2):413-19.
208. Sprod LK, Janelsins MC, Palesh OG, et al. Health-related quality of life and biomarkers in breast cancer survivors participating in tai chi chuan. *Journal of cancer survivorship* 2012;**6**(2):146-54.
209. Sprod LK, Fernandez ID, Janelsins MC, et al. Effects of yoga on cancer-related fatigue and global side-effect burden in older cancer survivors. *Journal of geriatric oncology* 2015;**6**(1):8-14.
210. Stan DL, Croghan KA, Croghan IT, et al. Randomized pilot trial of yoga versus strengthening exercises in breast cancer survivors with cancer-related fatigue. *Supportive care in cancer : official journal of the Multinational Association of Supportive Care in Cancer* 2016;**24**(9):4005-15 doi: 10.1007/s00520-016-3233-z.
211. Stanton AL, Ganz PA, Kwan L, et al. Outcomes from the Moving Beyond Cancer psychoeducational, randomized, controlled trial with breast cancer patients. *Journal of clinical oncology : official journal of the American Society of Clinical Oncology* 2005;**23**(25):6009-18 doi: 10.1200/jco.2005.09.101.
212. Steindorf K, Schmidt ME, Klassen O, et al. Randomized, controlled trial of resistance training in breast cancer patients receiving adjuvant radiotherapy: results on cancer-related fatigue and quality of life. *Annals of oncology : official journal of the European Society for Medical Oncology* 2014;**25**(11):2237-43 doi: 10.1093/annonc/mdu374.
213. Sturm I, Baak J, Storek B, Traore A, Thuss-Patience P. Effect of dance on cancer-related fatigue and quality of life. *Supportive care in cancer : official journal of the Multinational Association of Supportive Care in Cancer* 2014;**22**(8):2241-9 doi: 10.1007/s00520-014-2181-8.
214. Taso CJ, Lin HS, Lin WL, Chen SM, Huang WT, Chen SW. The effect of yoga exercise on improving depression, anxiety, and fatigue in women with breast cancer: a randomized controlled trial. *The journal of nursing research : JNR* 2014;**22**(3):155-64 doi: 10.1097/jnr.0000000000000044.
215. Thorsen L, Skovlund E, Stromme SB, Hornslien K, Dahl AA, Fossa SD. Effectiveness of physical activity on cardiorespiratory fitness and health-related quality of life in young and middle-aged cancer patients shortly after chemotherapy. *Journal of clinical oncology : official journal of the American Society of Clinical Oncology* 2005;**23**(10):2378-88 doi: 10.1200/jco.2005.04.106.
216. Travier N, Velthuis MJ, Steins Bisschop CN, et al. Effects of an 18-week exercise programme started early during breast cancer treatment: a randomised controlled trial. *BMC medicine* 2015;**13**:121 doi: 10.1186/s12916-015-0362-z.
217. Vadiraja SH, Rao MR, Nagendra RH, et al. Effects of yoga on symptom management in breast cancer patients: A randomized controlled trial [After]. *International journal of yoga* 2009;**2**(2):73-9 doi: 10.4103/0973-6131.60048.
218. Vadiraja SH, Rao MR, Nagendra RH, et al. Effects of yoga on symptom management in breast cancer patients: A randomized controlled trial [During]. *International journal of yoga* 2009;**2**(2):73-9 doi: 10.4103/0973-6131.60048.

219. Vallance JK, Courneya KS, Plotnikoff RC, Yasui Y, Mackey JR. Randomized controlled trial of the effects of print materials and step pedometers on physical activity and quality of life in breast cancer survivors. *Journal of Clinical Oncology* 2007;**25**(17):2352-59.
220. van der Lee ML, Garsen B. Mindfulness-based cognitive therapy reduces chronic cancer-related fatigue: a treatment study. *Psycho-Oncology* 2012;**21**(3):264-72.
221. Van Vulpen JK, Velthuis MJ, Steins Bisschop CN, et al. Effects of an Exercise Program in Colon Cancer Patients undergoing Chemotherapy. *Medicine and science in sports and exercise* 2016;**48**(5):767-75 doi: 10.1249/MSS.0000000000000855.
222. Vargas S, Antoni MH, Carver CS, et al. Sleep quality and fatigue after a stress management intervention for women with early-stage breast cancer in southern Florida. *International journal of behavioral medicine* 2014;**21**(6):971-81 doi: 10.1007/s12529-013-9374-2.
223. Wang YJ, Boehmke M, Wu YW, Dickerson SS, Fisher N. Effects of a 6-week walking program on Taiwanese women newly diagnosed with early-stage breast cancer. *Cancer nursing* 2011;**34**(2):E1-13 doi: 10.1097/NCC.0b013e3181e4588d.
224. Wang G, Wang S, Jiang P, Zeng C. [Effect of Yoga on cancer related fatigue in breast cancer patients with chemotherapy]. *Zhong nan da xue xue bao. Yi xue ban = Journal of Central South University. Medical sciences* 2014;**39**(10):1077-82 doi: 10.11817/j.issn.1672-7347.2014.10.016.
225. Wangnum K, Thanarojanawanich T, Chinwatanachai K, Jamprasert L, Maleehuan O, Janthakun V. Impact of the multidisciplinary education program in self-care on fatigue in lung cancer patients receiving chemotherapy. *Journal of the Medical Association of Thailand = Chotmai het thangphaet* 2013;**96**(12):1601-8.
226. Wenzel JA, Griffith KA, Shang J, et al. Impact of a home-based walking intervention on outcomes of sleep quality, emotional distress, and fatigue in patients undergoing treatment for solid tumors. *The oncologist* 2013;**18**(4):476-84 doi: 10.1634/theoncologist.2012-0278.
227. Willems RA, Bolman CA, Mesters I, Kanera IM, Beaulen AA, Lechner L. Short-term effectiveness of a web-based tailored intervention for cancer survivors on quality of life, anxiety, depression, and fatigue: randomized controlled trial. *Psycho-oncology* 2016 doi: 10.1002/pon.4113.
228. Windsor PM, Nicol KF, Potter J. A randomized, controlled trial of aerobic exercise for treatment-related fatigue in men receiving radical external beam radiotherapy for localized prostate carcinoma. *Cancer* 2004;**101**(3):550-7 doi: 10.1002/cncr.20378.
229. Winters-Stone KM, Dobek J, Bennett JA, Nail LM, Leo MC, Schwartz A. The effect of resistance training on muscle strength and physical function in older, postmenopausal breast cancer survivors: a randomized controlled trial. *Journal of cancer survivorship : research and practice* 2012;**6**(2):189-99 doi: 10.1007/s11764-011-0210-x.
230. Winters-Stone KM, Dobek JC, Bennett JA, et al. Resistance training reduces disability in prostate cancer survivors on androgen deprivation therapy: evidence from a randomized controlled trial. *Archives of physical medicine and rehabilitation* 2015;**96**(1):7-14.
231. Winters-Stone KM, Lyons KS, Dobek J, et al. Benefits of partnered strength training for prostate cancer survivors and spouses: results from a randomized controlled trial of the Exercising Together project. *Journal of cancer survivorship : research and practice* 2016;**10**(4):633-44 doi: 10.1007/s11764-015-0509-0.
232. Wiskemann J, Dreger P, Schwerdtfeger R, et al. Effects of a partly self-administered exercise program before, during, and after allogeneic stem cell transplantation. *Blood* 2011;**117**(9):2604-13.
233. Xu Y. Intervention of aerobic exercise on the cancer-related fatigue in breast cancer patients undergoing chemotherapy in outpatient department. *Hainan Med J* 2012;**23**(19):145-47.
234. Yagli NV, Ulger O. The effects of yoga on the quality of life and depression in elderly breast cancer patients. *Complementary therapies in clinical practice* 2015;**21**(1):7-10 doi: 10.1016/j.ctcp.2015.01.002.
235. Yates P, Aranda S, Hargraves M, et al. Randomized controlled trial of an educational intervention for managing fatigue in women receiving adjuvant chemotherapy for early-stage breast cancer. *Journal of clinical oncology : official journal of the American Society of Clinical Oncology* 2005;**23**(25):6027-36 doi: 10.1200/jco.2005.01.271.
236. Yeo TP, Burrell SA, Sauter PK, et al. A progressive postresection walking program significantly improves fatigue and health-related quality of life in pancreas and periampullary cancer patients. *Journal of the American College of Surgeons* 2012;**214**(4):463-75; discussion 75-7 doi: 10.1016/j.jamcollsurg.2011.12.017.
237. Yuen HK, Mitcham M, Morgan L. Managing post-therapy fatigue for cancer survivors using energy conservation training. *Journal of allied health* 2006;**35**(2):121e-39e.

238. Yuen HK, Sword D. Home-based exercise to alleviate fatigue and improve functional capacity among breast cancer survivors. *Journal of allied health* 2007;**36**(4):e257-75.
239. Yun YH, Lee KS, Kim YW, et al. Web-based tailored education program for disease-free cancer survivors with cancer-related fatigue: a randomized controlled trial. *Journal of clinical oncology : official journal of the American Society of Clinical Oncology* 2012;**30**(12):1296-303 doi: 10.1200/jco.2011.37.2979.
240. Zhang LL, Wang SZ, Chen HL, Yuan AZ. Tai Chi Exercise for Cancer-Related Fatigue in Patients With Lung Cancer Undergoing Chemotherapy: A Randomized Controlled Trial. *Journal of pain and symptom management* 2016;**51**(3):504-11 doi: 10.1016/j.jpainsymman.2015.11.020.
241. Vigarito S, Chachamovitz DS, Cordeiro MF, et al. Effects of physical activity on body composition and fatigue perception in patients on thyrotropin-suppressive therapy for differentiated thyroid carcinoma. *Thyroid : official journal of the American Thyroid Association* 2011;**21**(7):695-700 doi: 10.1089/thy.2010.0052.
242. van Waart H, Stuiver MM, van Harten WH, et al. Effect of Low-Intensity Physical Activity and Moderate- to High-Intensity Physical Exercise During Adjuvant Chemotherapy on Physical Fitness, Fatigue, and Chemotherapy Completion Rates: Results of the PACES Randomized Clinical Trial. *Journal of clinical oncology : official journal of the American Society of Clinical Oncology* 2015;**33**(17):1918-27 doi: 10.1200/JCO.2014.59.1081.
243. van Weert E, May AM, Korstjens I, et al. Cancer-related fatigue and rehabilitation: a randomized controlled multicenter trial comparing physical training combined with cognitive-behavioral therapy with physical training only and with no intervention. *Physical therapy* 2010;**90**(10):1413-25 doi: 10.2522/ptj.20090212.
244. van der Meulen IC, May AM, de Leeuw JR, et al. Long-term effect of a nurse-led psychosocial intervention on health-related quality of life in patients with head and neck cancer: a randomised controlled trial. *British journal of cancer* 2014;**110**(3):593-601 doi: 10.1038/bjc.2013.733.
245. von Gruenigen VE, Gibbons HE, Kavanagh MB, Janata JW, Lerner E, Courneya KS. A randomized trial of a lifestyle intervention in obese endometrial cancer survivors: quality of life outcomes and mediators of behavior change. *Health and quality of life outcomes* 2009;**7**(1):17.
