# Supplementary material for: Exercise and other non-pharmaceutical interventions for cancer-related fatigue in patients during or after cancer treatment: a systematic review incorporating an indirect-comparisons meta-analysis
Source: PubMed Central journal article supplement — Br J Sports Med. 2017 May 13;52(10):651–8. doi: 10.1136/bjsports-2016-096422 (PMC5931245; doi:10.1136/bjsports-2016-096422), 2017-05-13
Supplement: bjsports-2016-096422supp005.pdf [file bjsports-2016-096422supp005.pdf]

Appendix 5 Table 3. Matrix of the treatment effect estimates of all comparisons according to indirect comparison meta-analysis; during cancer treatment, all studies.

|                       | Aerobic             | CBT_PsychoSocial    | Combined             | CombinedCBT          | Control            | Dance               | HealingTouch_Polarity | Massage              | Music              | Relaxation           | Resistance           | TaiChi              | Yoga                |
|-----------------------|---------------------|---------------------|----------------------|----------------------|--------------------|---------------------|-----------------------|----------------------|--------------------|----------------------|----------------------|---------------------|---------------------|
| Aerobic               | Aerobic             | 0.33 (-0.13, 0.79)  | -0.15 (-0.57, 0.28)  | -0.19 (-0.86, 0.48)  | 0.53 (0.26, 0.8)   | 0.24 (-0.9, 1.37)   | 0.07 (-0.83, 0.97)    | -0.25 (-1.07, 0.56)  | 0.41 (-1.19, 2.03) | -0.23 (-0.76, 0.29)  | 0 (-0.53, 0.54)      | 0.3 (-0.51, 1.12)   | 0.02 (-0.55, 0.59)  |
| CBT_PsychoSocial      | -0.33 (-0.79, 0.13) | CBT_PsychoSocial    | -0.48 (-0.97, 0.02)  | -0.52 (-1.24, 0.21)  | 0.2 (-0.17, 0.57)  | -0.09 (-1.25, 1.07) | -0.26 (-1.19, 0.67)   | -0.58 (-1.44, 0.27)  | 0.08 (-1.54, 1.72) | -0.56 (-1.13, 0)     | -0.32 (-0.94, 0.29)  | -0.02 (-0.88, 0.83) | -0.31 (-0.93, 0.31) |
| Combined              | 0.15 (-0.28, 0.57)  | 0.48 (-0.02, 0.97)  | Combined             | -0.04 (-0.75, 0.66)  | 0.67 (0.34, 1.01)  | 0.38 (-0.77, 1.53)  | 0.22 (-0.7, 1.13)     | -0.11 (-0.94, 0.73)  | 0.56 (-1.06, 2.18) | -0.09 (-0.63, 0.45)  | 0.15 (-0.44, 0.74)   | 0.45 (-0.39, 1.29)  | 0.17 (-0.41, 0.75)  |
| CombinedCBT           | 0.19 (-0.48, 0.86)  | 0.52 (-0.21, 1.24)  | 0.04 (-0.66, 0.75)   | CombinedCBT          | 0.72 (0.09, 1.34)  | 0.43 (-0.84, 1.69)  | 0.26 (-0.81, 1.32)    | -0.06 (-1.06, 0.93)  | 0.6 (-1.11, 2.32)  | -0.05 (-0.82, 0.72)  | 0.19 (-0.6, 0.98)    | 0.49 (-0.49, 1.49)  | 0.21 (-0.59, 1.01)  |
| Control               | -0.53 (-0.8, -0.26) | -0.2 (-0.57, 0.17)  | -0.67 (-1.01, -0.34) | -0.72 (-1.34, -0.09) | Control            | -0.29 (-1.40, 0.81) | -0.46 (-1.32, 0.4)    | -0.78 (-1.55, -0.01) | -0.11 (-1.7, 1.48) | -0.77 (-1.22, -0.31) | -0.53 (-1.02, -0.03) | -0.23 (-0.99, 0.54) | -0.51 (-1.01, -0.0) |
| Dance                 | -0.24 (-1.37, 0.9)  | 0.09 (-1.07, 1.25)  | -0.38 (-1.53, 0.77)  | -0.43 (-1.69, 0.84)  | 0.29 (-0.81, 1.40) | Dance               | -0.17 (-1.57, 1.23)   | -0.49 (-1.83, 0.86)  | 0.17 (-1.76, 2.12) | -0.47 (-1.66, 0.72)  | -0.24 (-1.44, 0.98)  | 0.07 (-1.28, 1.42)  | -0.22 (-1.42, 0.99) |
| HealingTouch_Polarity | -0.07 (-0.97, 0.83) | 0.26 (-0.67, 1.19)  | -0.22 (-1.13, 0.7)   | -0.26 (-1.32, 0.81)  | 0.46 (-0.4, 1.32)  | 0.17 (-1.23, 1.57)  | HealingTouch_Polarity | -0.32 (-1.29, 0.65)  | 0.34 (-1.46, 2.15) | -0.3 (-1.24, 0.63)   | -0.07 (-1.05, 0.91)  | 0.23 (-0.92, 1.39)  | -0.05 (-1.04, 0.94) |
| Massage               | 0.25 (-0.56, 1.07)  | 0.58 (-0.27, 1.44)  | 0.11 (-0.73, 0.94)   | 0.06 (-0.93, 1.06)   | 0.78 (0.01, 1.55)  | 0.49 (-0.86, 1.83)  | 0.32 (-0.65, 1.29)    | Massage              | 0.67 (-1.1, 2.43)  | 0.02 (-0.87, 0.9)    | 0.26 (-0.66, 1.17)   | 0.56 (-0.53, 1.64)  | 0.27 (-0.64, 1.19)  |
| Music                 | -0.41 (-2.03, 1.19) | -0.08 (-1.72, 1.54) | -0.56 (-2.18, 1.06)  | -0.6 (-2.32, 1.11)   | 0.11 (-1.48, 1.7)  | -0.17 (-2.12, 1.76) | -0.34 (-2.15, 1.46)   | -0.67 (-2.43, 1.1)   | Music              | -0.65 (-2.3, 1)      | -0.41 (-2.08, 1.26)  | -0.11 (-1.88, 1.66) | -0.39 (-2.06, 1.27) |
| Relaxation            | 0.23 (-0.29, 0.76)  | 0.56 (0, 1.13)      | 0.09 (-0.45, 0.63)   | 0.05 (-0.72, 0.82)   | 0.77 (0.31, 1.22)  | 0.47 (-0.72, 1.66)  | 0.3 (-0.63, 1.24)     | -0.02 (-0.9, 0.87)   | 0.65 (-1, 2.3)     | Relaxation           | 0.24 (-0.37, 0.85)   | 0.54 (-0.35, 1.42)  | 0.26 (-0.4, 0.9)    |
| Resistance            | 0 (-0.54, 0.53)     | 0.32 (-0.29, 0.94)  | -0.15 (-0.74, 0.44)  | -0.19 (-0.98, 0.6)   | 0.53 (0.03, 1.02)  | 0.24 (-0.98, 1.44)  | 0.07 (-0.91, 1.05)    | -0.26 (-1.17, 0.66)  | 0.41 (-1.26, 2.08) | -0.24 (-0.85, 0.37)  | Resistance           | 0.3 (-0.57, 1.18)   | 0.02 (-0.68, 0.72)  |
| TaiChi                | -0.3 (-1.12, 0.51)  | 0.02 (-0.83, 0.88)  | -0.45 (-1.29, 0.39)  | -0.49 (-1.49, 0.49)  | 0.23 (-0.54, 0.99) | -0.07 (-1.42, 1.28) | -0.23 (-1.39, 0.92)   | -0.56 (-1.64, 0.53)  | 0.11 (-1.66, 1.88) | -0.54 (-1.42, 0.35)  | -0.3 (-1.18, 0.57)   | TaiChi              | -0.28 (-1.2, 0.63)  |
| Yoga                  | -0.02 (-0.59, 0.55) | 0.31 (-0.31, 0.93)  | -0.17 (-0.75, 0.41)  | -0.21 (-1.01, 0.59)  | 0.51 (0.00, 1.01)  | 0.22 (-0.99, 1.42)  | 0.05 (-0.94, 1.04)    | -0.27 (-1.19, 0.64)  | 0.39 (-1.27, 2.06) | -0.26 (-0.9, 0.4)    | -0.02 (-0.72, 0.68)  | 0.28 (-0.63, 1.2)   | Yoga                |

Aerobic = endurance training; CBT\_PsychoSocial = cognitive behavioural treatments or psychosocial interventions; Combined = combined endurance and resistance training; Control = usual care or waiting list; HealingTouch\_Polarity = Treatments were touch was the intervention (not including massage); Relaxation = different interventions with the aim to relax, including meditation; Resistance = resistance training.

A negative value indicates a better effect for the treatment written above.
