# Supplementary material for: Exercise and other non-pharmaceutical interventions for cancer-related fatigue in patients during or after cancer treatment: a systematic review incorporating an indirect-comparisons meta-analysis
Source: PubMed Central journal article supplement — Br J Sports Med. 2017 May 13;52(10):651–8. doi: 10.1136/bjsports-2016-096422 (PMC5931245; doi:10.1136/bjsports-2016-096422), 2017-05-13
Supplement: bjsports-2016-096422supp007.pdf [file bjsports-2016-096422supp007.pdf]

Appendix 7 Table 5. Matrix of the treatment effect estimates of all comparisons according to indirect comparison meta-analysis; after cancer treatment, with all studies.

|                           | Aerobic              | CBT_PsychoSocial     | Combined            | CombinedCBT         | Control            | Dance               | InspiratoryMuscleTraining | Massage             | Relaxation          | Resistance           | TaiChi               | Yoga                 |
|---------------------------|----------------------|----------------------|---------------------|---------------------|--------------------|---------------------|---------------------------|---------------------|---------------------|----------------------|----------------------|----------------------|
| Aerobic                   | Aerobic              | -0.08 (-0.32, 0.16)  | -0.16 (-0.39, 0.07) | -0.12 (-0.41, 0.18) | 0.33 (0.16, 0.51)  | -0.2 (-0.86, 0.47)  | -0.24 (-0.96, 0.49)       | 0.06 (-0.86, 0.99)  | 0.28 (-0.3, 0.86)   | -0.01 (-0.32, 0.29)  | -0.12 (-0.54, 0.31)  | -0.35 (-0.65, -0.05) |
| CBT_PsychoSocial          | 0.08 (-0.16, 0.32)   | CBT_PsychoSocial     | -0.08 (-0.31, 0.15) | -0.03 (-0.33, 0.26) | 0.42 (0.25, 0.58)  | -0.11 (-0.78, 0.55) | -0.15 (-0.88, 0.57)       | 0.14 (-0.78, 1.07)  | 0.36 (-0.24, 0.97)  | 0.07 (-0.25, 0.39)   | -0.03 (-0.46, 0.39)  | -0.27 (-0.56, 0.03)  |
| Combined                  | 0.16 (-0.07, 0.39)   | 0.08 (-0.15, 0.31)   | Combined            | 0.05 (-0.23, 0.32)  | 0.5 (0.34, 0.66)   | -0.04 (-0.7, 0.63)  | -0.07 (-0.79, 0.65)       | 0.22 (-0.7, 1.15)   | 0.44 (-0.16, 1.04)  | 0.15 (-0.16, 0.47)   | 0.05 (-0.38, 0.47)   | -0.19 (-0.48, 0.11)  |
| CombinedCBT               | 0.12 (-0.18, 0.41)   | 0.03 (-0.26, 0.33)   | -0.05 (-0.32, 0.23) | CombinedCBT         | 0.45 (0.21, 0.7)   | -0.08 (-0.77, 0.61) | -0.12 (-0.86, 0.63)       | 0.18 (-0.76, 1.12)  | 0.4 (-0.23, 1.03)   | 0.1 (-0.26, 0.47)    | 0 (-0.46, 0.47)      | -0.23 (-0.58, 0.12)  |
| Control                   | -0.33 (-0.51, -0.16) | -0.42 (-0.58, -0.25) | -0.5 (-0.66, -0.34) | -0.45 (-0.7, -0.21) | Control            | -0.53 (-1.18, 0.11) | -0.57 (-1.28, 0.14)       | -0.27 (-1.18, 0.64) | -0.05 (-0.64, 0.53) | -0.35 (-0.62, -0.08) | -0.45 (-0.84, -0.06) | -0.68 (-0.93, -0.43) |
| Dance                     | 0.2 (-0.47, 0.86)    | 0.11 (-0.55, 0.78)   | 0.04 (-0.63, 0.7)   | 0.08 (-0.61, 0.77)  | 0.53 (-0.11, 1.18) | Dance               | -0.04 (-0.99, 0.91)       | 0.26 (-0.85, 1.37)  | 0.48 (-0.37, 1.32)  | 0.19 (-0.51, 0.88)   | 0.08 (-0.59, 0.76)   | -0.15 (-0.84, 0.54)  |
| InspiratoryMuscleTraining | 0.24 (-0.49, 0.96)   | 0.15 (-0.57, 0.88)   | 0.07 (-0.65, 0.79)  | 0.12 (-0.63, 0.86)  | 0.57 (-0.14, 1.28) | 0.04 (-0.91, 0.99)  | InspiratoryMuscleTraining | 0.3 (-0.85, 1.45)   | 0.52 (-0.4, 1.43)   | 0.22 (-0.53, 0.98)   | 0.12 (-0.68, 0.93)   | -0.11 (-0.86, 0.63)  |
| Massage                   | -0.06 (-0.99, 0.86)  | -0.14 (-1.07, 0.78)  | -0.22 (-1.15, 0.7)  | -0.18 (-1.12, 0.76) | 0.27 (-0.64, 1.18) | -0.26 (-1.37, 0.85) | -0.3 (-1.45, 0.85)        | Massage             | 0.22 (-0.86, 1.3)   | -0.07 (-1.02, 0.88)  | -0.18 (-1.16, 0.81)  | -0.41 (-1.35, 0.53)  |
| Relaxation                | -0.28 (-0.86, 0.3)   | -0.36 (-0.97, 0.24)  | -0.44 (-1.04, 0.16) | -0.4 (-1.03, 0.23)  | 0.05 (-0.53, 0.64) | -0.48 (-1.32, 0.37) | -0.52 (-1.43, 0.4)        | -0.22 (-1.3, 0.86)  | Relaxation          | -0.29 (-0.89, 0.31)  | -0.4 (-1.03, 0.24)   | -0.63 (-1.26, 0)     |
| Resistance                | 0.01 (-0.29, 0.32)   | -0.07 (-0.39, 0.25)  | -0.15 (-0.47, 0.16) | -0.1 (-0.47, 0.26)  | 0.35 (0.08, 0.62)  | -0.19 (-0.88, 0.51) | -0.22 (-0.98, 0.53)       | 0.07 (-0.88, 1.02)  | 0.29 (-0.31, 0.89)  | Resistance           | -0.1 (-0.57, 0.37)   | -0.34 (-0.7, 0.02)   |
| TaiChi                    | 0.12 (-0.31, 0.54)   | 0.03 (-0.39, 0.46)   | -0.05 (-0.47, 0.38) | 0 (-0.47, 0.46)     | 0.45 (0.06, 0.84)  | -0.08 (-0.76, 0.59) | -0.12 (-0.93, 0.68)       | 0.18 (-0.81, 1.16)  | 0.4 (-0.24, 1.03)   | 0.1 (-0.37, 0.57)    | TaiChi               | -0.23 (-0.7, 0.23)   |
| Yoga                      | 0.35 (0.05, 0.65)    | 0.27 (-0.03, 0.56)   | 0.19 (-0.11, 0.48)  | 0.23 (-0.12, 0.58)  | 0.68 (0.43, 0.93)  | 0.15 (-0.54, 0.84)  | 0.11 (-0.63, 0.86)        | 0.41 (-0.53, 1.35)  | 0.63 (0, 1.26)      | 0.34 (-0.02, 0.7)    | 0.23 (-0.23, 0.7)    | Yoga                 |

Aerobic = endurance training; CBT\_PsychoSocial = cognitive behavioural treatments or psychosocial interventions; Combined = combined endurance and resistance training; Control = usual care or waiting list; InspiratoryMuscleTraining = Training of the inspiratory muscles; Relaxation = different interventions with the aim to relax, including meditation; Resistance = resistance training.

A negative value indicates a better effect for the treatment written above.
