# Supplementary material for: Exercise and other non-pharmaceutical interventions for cancer-related fatigue in patients during or after cancer treatment: a systematic review incorporating an indirect-comparisons meta-analysis
Source: PubMed Central journal article supplement — Br J Sports Med. 2017 May 13;52(10):651–8. doi: 10.1136/bjsports-2016-096422 (PMC5931245; doi:10.1136/bjsports-2016-096422), 2017-05-13
Supplement: bjsports-2016-096422supp008.pdf [file bjsports-2016-096422supp008.pdf]

Appendix 8 Table 6. Matrix of the treatment effect estimates of all comparisons according to indirect comparison meta-analysis; after cancer treatment, without studies with less than 25 patients per arm on average.

|                         | <b>Aerobic</b>       | <b>CBT_PsychoSocial</b> | <b>Combined</b>      | <b>CombinedCBT</b>   | <b>Control</b>     | <b>Dance</b>        | <b>Massage</b>      | <b>Relaxation</b>   | <b>Resistance</b>   | <b>TaiChi</b>       | <b>Yoga</b>          |
|-------------------------|----------------------|-------------------------|----------------------|----------------------|--------------------|---------------------|---------------------|---------------------|---------------------|---------------------|----------------------|
| <b>Aerobic</b>          | <b>Aerobic</b>       | -0.07 (-0.34, 0.2)      | -0.16 (-0.43, 0.1)   | -0.06 (-0.4, 0.29)   | 0.31 (0.10, 0.51)  | 0.02 (-0.82, 0.87)  | 0.04 (-0.89, 0.96)  | 0.28 (-0.39, 0.96)  | 0.07 (-0.34, 0.49)  | -0.08 (-0.56, 0.41) | -0.44 (-0.85, -0.02) |
| <b>CBT_PsychoSocial</b> | 0.07 (-0.2, 0.34)    | <b>CBT_PsychoSocial</b> | -0.09 (-0.35, 0.16)  | 0.01 (-0.33, 0.36)   | 0.38 (0.2, 0.56)   | 0.1 (-0.74, 0.93)   | 0.11 (-0.82, 1.02)  | 0.36 (-0.36, 1.06)  | 0.14 (-0.28, 0.57)  | -0.01 (-0.48, 0.47) | -0.36 (-0.77, 0.04)  |
| <b>Combined</b>         | 0.16 (-0.1, 0.43)    | 0.09 (-0.16, 0.35)      | <b>Combined</b>      | 0.1 (-0.21, 0.42)    | 0.47 (0.29, 0.65)  | 0.19 (-0.65, 1.02)  | 0.2 (-0.73, 1.12)   | 0.45 (-0.26, 1.15)  | 0.23 (-0.19, 0.66)  | 0.08 (-0.39, 0.56)  | -0.28 (-0.68, 0.13)  |
| <b>CombinedCBT</b>      | 0.06 (-0.29, 0.4)    | -0.01 (-0.36, 0.33)     | -0.1 (-0.42, 0.21)   | <b>CombinedCBT</b>   | 0.37 (0.07, 0.66)  | 0.08 (-0.79, 0.95)  | 0.09 (-0.86, 1.04)  | 0.34 (-0.4, 1.09)   | 0.13 (-0.35, 0.61)  | -0.02 (-0.55, 0.51) | -0.38 (-0.84, 0.09)  |
| <b>Control</b>          | -0.31 (-0.51, -0.10) | -0.38 (-0.56, -0.2)     | -0.47 (-0.65, -0.29) | -0.37 (-0.66, -0.07) | <b>Control</b>     | -0.28 (-1.10, 0.53) | -0.27 (-1.18, 0.63) | -0.02 (-0.72, 0.66) | -0.24 (-0.62, 0.15) | -0.39 (-0.83, 0.05) | -0.74 (-1.1, -0.38)  |
| <b>Dance</b>            | -0.02 (-0.87, 0.82)  | -0.1 (-0.93, 0.74)      | -0.19 (-1.02, 0.65)  | -0.08 (-0.95, 0.79)  | 0.28 (-0.53, 1.10) | <b>Dance</b>        | 0.01 (-1.21, 1.23)  | 0.26 (-0.81, 1.33)  | 0.05 (-0.85, 0.95)  | -0.11 (-0.91, 0.7)  | -0.46 (-1.35, 0.44)  |
| <b>Massage</b>          | -0.04 (-0.96, 0.89)  | -0.11 (-1.02, 0.82)     | -0.2 (-1.12, 0.73)   | -0.09 (-1.04, 0.86)  | 0.27 (-0.63, 1.18) | -0.01 (-1.23, 1.21) | <b>Massage</b>      | 0.25 (-0.89, 1.38)  | 0.04 (-0.95, 1.02)  | -0.12 (-1.12, 0.89) | -0.47 (-1.44, 0.5)   |
| <b>Relaxation</b>       | -0.28 (-0.96, 0.39)  | -0.36 (-1.06, 0.36)     | -0.45 (-1.15, 0.26)  | -0.34 (-1.09, 0.4)   | 0.02 (-0.66, 0.72) | -0.26 (-1.33, 0.81) | -0.25 (-1.38, 0.89) | <b>Relaxation</b>   | -0.21 (-0.9, 0.48)  | -0.37 (-1.17, 0.46) | -0.72 (-1.49, 0.06)  |
| <b>Resistance</b>       | -0.07 (-0.49, 0.34)  | -0.14 (-0.57, 0.28)     | -0.23 (-0.66, 0.19)  | -0.13 (-0.61, 0.35)  | 0.24 (-0.15, 0.62) | -0.05 (-0.95, 0.85) | -0.04 (-1.02, 0.95) | 0.21 (-0.48, 0.9)   | <b>Resistance</b>   | -0.15 (-0.74, 0.43) | -0.51 (-1.04, 0.02)  |
| <b>TaiChi</b>           | 0.08 (-0.41, 0.56)   | 0.01 (-0.47, 0.48)      | -0.08 (-0.56, 0.39)  | 0.02 (-0.51, 0.55)   | 0.39 (-0.05, 0.83) | 0.11 (-0.7, 0.91)   | 0.12 (-0.89, 1.12)  | 0.37 (-0.46, 1.17)  | 0.15 (-0.43, 0.74)  | <b>TaiChi</b>       | -0.35 (-0.93, 0.21)  |
| <b>Yoga</b>             | 0.44 (0.02, 0.85)    | 0.36 (-0.04, 0.77)      | 0.28 (-0.13, 0.68)   | 0.38 (-0.09, 0.84)   | 0.74 (0.38, 1.1)   | 0.46 (-0.44, 1.35)  | 0.47 (-0.5, 1.44)   | 0.72 (-0.06, 1.49)  | 0.51 (-0.02, 1.04)  | 0.35 (-0.21, 0.93)  | <b>Yoga</b>          |

Aerobic = endurance training; CBT\_PsychoSocial = cognitive behavioural treatments or psychosocial interventions; Combined = combined endurance and resistance training; Control = usual care or waiting list; Relaxation = different interventions with the aim to relax, including meditation; Resistance = resistance training.

A negative value indicates a better effect for the treatment written above.
